# Supplementary material for: Stochastic asymmetric repartition of lytic machinery in dividing CD8+ T cells generates heterogeneous killing behavior
Source: eLife. 2021 Jan 11;10:e62691. doi: 10.7554/eLife.62691 (PMC7867409; doi:10.7554/eLife.62691)
Supplement: Figure 1—source data 1. [file elife-62691-fig1-data1.xlsx]

## Sheet: Figure 1
CD107a, perforin and granzyme B distribution between daughter cells
	All cell divisions				All cell divisions				All cell divisions				All cell divisions
	Distribution between daughter cells				Distribution between daughter cells				Distribution between daughter cells				Distribution between daughter cells
	CD107a	CTV			Perforin	CTV			GrzB	CTV			CD107a (clones)	CTV
Experiment #1	32.3552	42.0647		Experiment #1	49.1497	47.4259		Experiment #1	52.5539	52.9877		Experiment #1	49.8674	49.1357
	49.5864	46.2145			62.1873	47.0297			55.3017	57.8226			61.816	51.8514
	43.4835	52.518			53.8037	52.0925			44.3505	44.3513			53.2822	49.0007
	49.0065	52.289			62.8403	53.081			51.5765	49.7715			48.22	50.2929
	50.8801	54.0472			47.3952	47.4828			51.4782	38.7194			62.5429	47.5142
	47.3738	53.9532			59.4851	49.3775			40.0102	47.469			56.4946	50.816
	43.89	50.0426			52.3983	52.7879			47.3428	51.3884			42.8487	47.8056
	49.1799	55.6416			49.5903	49.7696			46.8627	49.9775			64.4631	48.0894
	53.5021	47.5981			53.5377	49.232			37.2014	50.3717			44.7278	41.6566
	38.457	51.2102			44.2632	51.3393			39.3436	47.8194			44.8547	53.8813
	50.2592	50.1806			36.9612	47.5131			45.8661	46.2796			41.3588	43.8266
	53.8535	52.8907			52.2713	52.3012			55.5387	53.8977			42.2878	47.3754
	40.9581	47.6746			49.2749	45.879			52.4528	54.4571			41.2256	51.2197
	57.7989	47.8328			42.2099	47.1352			44.1186	53.912			49.3707	49.6193
	49.1703	51.0946			48.22	47.1272			46.206	50.0424			53.5812	50.3802
	67.5847	53.9555			53.8813	49.147			47.9785	50.2208			49.5722	48.7206
	53.9031	40.1359			46.7174	48.0652			46.7865	49.8677			40.7225	51.1174
	53.6563	48.1164			49.7768	52.2991			47.7692	45.7515			50.0496	51.3487
	44.0831	44.1927			45.044	44.5722			55.624	48.9389			46.5116	49.3697
	23.0486	48.7392			48.9913	47.9483			49.3324	49.8072			54.4858	50.4823
	53.5929	51.9426			68.9773	48.2909			54.0289	57.3858			39.9459	47.72
	48.6569	49.5659			53.1076	52.6735			51.3971	52.8701			38.7015	47.0627
	51.8993	50.3316			39.917	49.0246			44.4984	43.63			33.1768	49.1868
	59.1048	54.4413			56.6173	51.7436			54.2015	51.4216			59.7233	45.4224
	42.4327	49.7576			49.0162	50.9665			44.3067	49.246			45.2034	48.7348
	51.9575	56.3692			48.0091	49.1657			59.7651	79.5621			65.3447	56.8825
	58.4645	53.7265			44.5344	52.555			51.1219	53.9034			49.0919	51.7546
	73.3113	59.6279			52.9468	50.2923			49.4885	54.2431			48.9453	47.818
	61.7338	55.629			45.669	46.5789			49.1645	46.8755			58.0124	56.2183
	52.2937	34.6101			49.365	48.4281			50.8491	49.5394			54.1893	47.9494
	51.5699	52.82			50.8679	50.3041			59.5372	48.6907			51.286	49.3665
	55.1317	52.9943			49.2801	49.2228			43.7698	47.2883			49.8751	47.8425
	52.8577	48.0807			45.4552	46.5178			45.4423	46.4231			49.7796	49.9364
	70.5096	47.9918			59.5152	50.7171			40.192	47.6512			48.4471	51.9773
	28.9403	48.3812			44.1753	50.1971			50.1418	47.7729			54.5819	54.1361
	62.5209	53.3327		Experiment #2	49.8258	52.6369			48.9531	54.5224			49.0409	52.3884
	49.9086	51.3216			54.0466	51.4764			51.1943	49.3747			49.1437	47.9666
	49.8782	46.9368			43.8761	52.8605			57.9949	52.8619			39.01	47.868
	40.5992	49.5663			48.1728	47.7152			62.5413	51.9273			38.4877	51.1048
	50.2437	45.7248			51.1311	50.646			46.4736	49.6373			50.5308	51.9821
	53.3368	50.9973			56.0337	51.1708			45.7592	50.0603			59.2027	52.526
	50.5041	55.7318			50.6628	50.0524			33.9767	51.1501			44.5814	51.1687
	34.2785	49.7103			40.6038	50.735			47.3061	45.0688			40.5382	46.3612
	45.4224	50.0304			55.075	52.947			57.4474	52.3384			37.1567	43.906
	30.9754	27.2083			45.9719	44.4394			59.2055	51.3226			63.1773	55.221
	43.4616	47.9535			49.3337	51.7554			53.0145	54.9835			53.2743	46.4787
	53.9748	53.0361			56.7593	49.9797			54.6176	52.3643			52.2035	46.6148
	56.0969	52.7711			39.2765	48.385			52.4209	50.9803			56.8826	47.7924
	45.105	46.7582			51.5464	51.1524			27.1915	48.2534			59.6787	48.4155
	44.8328	53.4868			51.3668	49.5261			60.312	44.8112			40.7667	52.7899
	44.7212	48.3967			57.4952	47.362			59.6977	57.7824			41.3311	49.1859
	58.5675	55.0971			50.3119	50.9939			37.1595	55.9825			54.9243	50.0017
	50.9387	50.9461			48.4041	52.6502			40.4048	53.4863			47.8569	50.3957
	59.7907	55.7848			50.0635	51.7886			49.2299	48.2187			38.3559	44.1318
	58.2822	48.6543			45.1421	47.3559			47.115	50.8882			68.648	51.5347
	42.3929	44.48			43.3144	49.282			61.5922	50.0673			42.4454	46.2791
	47.2974	55.0216			50.8422	50.7819			63.9063	49.7349			49.5939	44.8568
	50.6081	51.228			50.4475	50.9021			33.1345	44.6922			53.5169	52.7192
	53.677	55.1942			50.8756	53.308			53.3743	54.8175			49.3305	49.4325
	52.8189	49.626			52.628	51.6491			46.4672	47.8642			45.1195	46.3898
	37.2344	47.7106			49.6587	49.5928			46.0019	46.3966			45.158	50.7415
	46.9119	49.5541			62.403	53.7815			44.9482	44.328			57.3657	47.4438
	51.824	50.645			50.1007	49.0218			51.117	46.2491			45.1678	53.3456
	59.1976	51.6849			59.304	49.0938			33.4324	43.1637			36.4108	51.2867
	43.0239	50.1475			45.7007	49.7842			49.5903	51.5859			58.5014	47.7094
	55.3604	53.3178			57.7258	51.9429			57.1487	52.1097			58.2928	48.9712
	65.4007	51.0142			40.9914	45.3413			39.1868	43.2629			32.5812	48.6344
	41.4988	49.9287			53.8813	49.147			43.0181	45.1509			45.1833	48.4606
	32.4217	49.1297			51.8428	52.1219			47.8665	52.7091			32.529	49.3533
	44.2638	47.0025			53.6095	51.8554			44.0471	51.4802			58.181	81.5934
	47.778	52.2219			59.9533	48.9882			54.2558	49.8702			51.117	49.4261
	62.1509	51.959			46.2205	48.1123			36.5001	53.2787			39.1231	31.6813
	49.1794	51.1516			57.7229	51.376			49.0402	51.8443			58.2074	46.102
	56.4593	50.9257			45.9123	52.1405			53.9114	54.9447			45.9269	44.9417
	59.0563	49.4118			48.8497	52.0858			53.3684	56.1766			47.561	48.4417
	41.9902	48.7396			42.6507	46.4266			43.4944	45.3026			52.7694	51.0748
	53.4423	44.7143			62.9036	49.3687			52.7926	55.6378			49.4323	50.5661
	63.7097	58.1234			45.9188	48.9078			44.5909	52.4385			54.7855	54.1863
	37.0479	48.6047			51.8826	49.6048			42.8514	45.7968			58.9855	50.8166
	39.1503	46.9391			51.4721	50.9926			53.4791	52.4965			47.2543	45.0241
	44.2756	48.0743			55.7592	51.186			49.8465	51.842			49.3238	48.0474
	58.2933	53.4752			49.2316	50.1656			47.336	51.3988			43.4069	47.7921
	53.2764	51.3236			33.412	47.5101			57.1194	56.4935			48.8725	48.2357
	30.8237	45.3968			50.2831	49.433			47.2566	50.0132			54.6438	48.8283
	56.4252	51.9307			53.9157	51.9219			47.6282	52.5689			47.4738	49.8932
	51.4843	51.4713			49.2801	49.2228			54.3742	56.0575			52.305	54.2181
	43.728	45.2054			51.9286	45.5852			59.3957	52.5418			41.7968	48.2342
	40.3753	48.2442			44.8865	46.5685			45.598	54.1376			47.2637	45.8387
	58.6123	51.5266			49.1598	49.0566			44.795	45.7947			57.958	53.5328
	61.2766	50.3991			50.0037	48.7339			43.1905	52.8211			44.2809	47.6801
	46.0858	44.2771			50.6231	50.5778			53.5575	46.7631			50.0045	56.0354
	50.4288	49.8293			50.7622	48.3194			43.1752	42.3174			40.1993	49.2392
	35.2605	48.8752			49.7801	49.2734			58.7215	52.9995			53.1278	46.2256
	45.997	49.6347			47.4582	50.4611			58.4899	50.4074			41.8087	44.5895
	59.6075	49.005			41.9399	48.2825			54.9425	57.7701			49.8846	50.6416
	44.5423	47.4871		Experiment #2	51.4678	51.4215			41.243	48.3664			45.9051	50.9899
	66.073	51.0981			47.0857	46.5093			47.3263	53.9433			50.5102	50.9538
	51.6594	50.9506			58.2141	52.8376			28.0451	32.2102			50.2441	63.6747
	77.5562	50.9333			50.9704	51.6966			47.6224	52.2278			44.7872	45.5838
	46.7338	49.8911			46.7248	42.8513			69.7764	53.5221			49.5058	48.769
	42.072	50.0831			47.302	45.9498			67.2122	46.538			61.4526	59.543
					48.1399	52.2872			53.116	49.5836			48.6489	48.6842
	51.8274	47.2622			47.0366	46.7767			45.2202	47.3805			71.9039	55.3372
	38.6762	46.8905			42.8411	53.0908			40.7416	50.1355			57.3303	49.4393
	26.4294	47.2735			54.3667	51.2104			48.6585	50.7146			54.4591	50.9352
	68.3084	51.637			46.7464	46.0457			44.1007	52.2832			54.8745	47.6985
	46.5335	52.9017			52.5084	55.5409			39.3591	49.456			69.3853	61.6086
	44.108	47.2655			51.2928	50.7584			54.4475	53.1817			48.133	48.0575
	49.4745	45.1998			51.9177	53.9651			48.6654	51.6127			33.5094	43.9713
	55.422	53.6881			38.8904	55.6345			49.7804	48.5219			42.4906	47.4378
	41.8051	40.9705			51.419	56.3915			49.0781	54.3042			49.7711	47.9494
	51.4503	48.0391			35.7686	51.0118			45.9443	56.7508			49.9936	48.8735
	50.3719	45.6706			53.2952	48.7551			44.6504	49.5284			51.6414	52.4395
	33.4281	41.6812			48	47.2887			60.4288	53.1057			52.2479	49.9169
	59.155	48.6928			49.7593	49.6712			53.032	54.1343			35.0417	43.0389
	44.3037	49.7477			54.0113	51.6721			57.9637	53.2672			55.6434	51.3022
	36.4047	51.0865			44.2317	49.0137			39.8975	49.6581			38.5834	49.387
	62.7206	48.3697			52.869	49.6131			56.512	57.1456			56.503	47.9556
	35.651	41.7263			50.6089	54.8445			37.3967	48.1796			53.7243	46.1577
	58.3806	53.7056			30.9375	44.911			44.2656	52.2223			45.1362	49.9202
	47.073	43.9965			45.6518	46.3301			38.6336	55.1306			51.8962	50.8259
	59.6183	54.7932			68.5497	52.1844			55.6145	54.6068			40.5136	44.8939
	51.1351	47.0672			27.6311	45.4215			50.7771	50.4851			48.9642	48.3594
	71.6906	47.1995			38.2754	51.5772			52.881	50.3764			51.2758	49.5237
	61.2644	50.3361			33.9515	47.4074			44.9877	49.0092			46.2614	50.2353
	47.9755	47.6161			72.5281	52.6563			52.3697	47.6871			47.5756	52.4795
	52.3492	49.1535			55.2155	52.4949			47.6849	46.2469			43.7252	45.0974
	62.8178	49.6944			61.8235	50.7302			55.0319	52.0358			55.5847	51.3762
	67.6114	51.5142			47.1468	49.4529			49.504	50.6224			46.9154	50.7005
	55.454	53.6161			51.6974	53.7477			39.4166	49.7922			49.2174	49.3197
	54.2936	47.3935			45.6499	51.3691			50.2089	52.2674			37.6844	50.8008
	50.6487	53.0503			43.5816	47.3402			51.2348	48.7707			45.1812	51.1896
	50.7528	48.6461			47.4478	47.9542			44.7254	55.213			44.2161	50.5701
	39.6439	45.7234			51.2317	47.8232			51.9806	49.3037			44.9415	48.0396
	54.8595	45.8021			40.7278	48.575			43.6501	48.0852			41.2663	49.5029
	31.5564	48.3132			37.8184	49.9484			48.9155	53.9715			59.0436	58.0234
	45.9299	49.6136		Experiment #3	54.2807	54.2483			44.8278	46.4297			46.9305	48.5238
	37.8843	48.3344			49.6101	49.0103			54.5412	51.8298			49.4663	47.3323
	42.1074	49.2295			43.9134	78.0627			42.4433	51.9106			53.3884	53.3024
	50.4089	47.0135			52.334	50.935			37.9681	44.1551			47.224	50.5461
	40.8151	50.2796			46.7502	48.0543			54.5228	51.0351			54.0249	53.2262
	40.5456	46.6647			52.6247	53.5933			41.3185	55.0162			55.3871	43.775
	69.7626	57.4174			59.6761	52.4162			71.7846	52.7055			48.7266	48.85
	61.8495	55.3357			55.001	53.8571			50.946	56.1155			50.1294	47.7668
	48.251	52.5164			47.5356	46.7544			76.6334	52.754			49.3975	50.1255
	62.5122	56.9519			46.8052	47.2824			40.2395	52.083			46.8147	44.9808
	53.2254	52.7511			46.8862	44.8998			51.547	49.7547			51.9209	48.6773
	47.1615	50.8014			46.7409	51.7371			47.479	50.3337			46.9038	49.3048
	50.9521	54.348			39.0592	50.9872			47.0644	48.9584			52.5096	48.9062
	57.345	51.2787			51.1093	49.953			47.2359	51.0168			58.646	50.7601
	58.8071	54.0188			47.8368	49.6068			42.7767	51.3727			51.2486	44.4162
	44.9542	43.9542			43.2724	46.9466			43.4919	49.5518			43.6824	46.4561
	46.7428	49.7741			43.5441	49.9021			55.9468	56.6728			38.7763	47.407
	48.9989	49.0121			53.574	51.6054			44.9247	45.0585			47.2478	49.9062
	55.0278	50.6556			50.5725	49.4723			51.7617	47.2321			51.0111	48.9885
	51.9579	52.8705			55.1548	49.957			51.8174	53.6971			54.0385	52.7709
	49.0133	51.2115			52.8531	52.8953			23.0364	44.8312			56.9052	61.931
	38.1048	47.9398			48.1156	48.543			49.907	55.6787			44.3193	44.2727
	52.8246	50.7794			46.6992	47.3011			43.9604	48.4801			55.4321	49.9968
	47.6912	46.685			42.5923	46.6534			52.1266	54.1702			45.9142	45.7466
	47.7683	54.1519			47.9273	47.4794			53.2933	54.0236			51.8939	50.8297
	56.3313	48.3464			50.4699	51.3974			35.4737	45.8553			44.9798	48.0397
	44.9751	51.9229			48.5868	48.9921			39.6691	49.4482			57.45	52.5232
	39.113	53.412			53.8502	51.8373			56.8413	53.9283			37.9925	48.901
	60.7993	56.9891			63.3887	50.9661			56.9272	50.1506			49.226	50.0512
	51.95	51.5223			63.3219	53.8305			53.0362	48.8204			35.5025	43.1812
	30.1568	50.7658			54.3295	48.0435			51.2512	50.2577			60.3262	54.3707
	53.9594	55.1356			49.2883	52.465			63.1543	51.9005			48.0708	53.1805
	52.4399	49.6119			69.5512	56.935			52.6629	49.4508			44.8919	51.043
	83.4953	56.4624			38.2324	50.4783			57.4023	46.4174			42.5828	49.2841
	37.2531	49.0663			52.1775	50.482			47.7744	47.9694			53.8402	52.4803
	58.4485	49.1007			47.0823	47.9038			55.9357	54.4125			42.4416	46.8143
	63.4012	51.9342			48.4712	48.7051			49.977	49.064		Experiment #2	63.7177	48.4231
	59.8321	53.8361			46.9369	47.0448			52.8206	55.5897			78.9573	52.5166
	58.2991	52.6593			53.9995	49.5451			48.9774	54.7835			47.4421	51.1459
	60.0444	55.0753			49.0617	51.4719			50.3403	45.3369			27.8126	45.8432
	50.6019	46.5428			43.3276	45.7533			45.8461	53.3902			46.2148	47.2878
	54.3129	47.0486			52.2805	51.3581			58.5767	53.0142			63.502	53.1082
	47.435	48.7796			40.2821	43.7134			44.3511	44.5899			43.9638	49.0124
	45.4335	50.0046			48.8633	50.7468			50.2247	52.1802			53.7858	52.8225
	50.7186	51.3544			38.6053	44.7584			64.7504	47.0897			56.8209	52.2381
	56.9204	54.3552			51.7276	49.1758			50.8978	46.5704			49.0879	48.6256
	44.9913	49.4261			51.3561	49.9761			51.4011	44.0542			49.5736	46.7287
	48.4295	45.5217			50.1947	49.7383			41.8214	52.3089			54.4702	52.4623
	70.5408	58.2325			52.6186	50.9993			48.8153	49.1886			48.6654	51.0784
	55.3561	53.9288			38.169	46.9898			35.9079	45.8492			53.0331	57.1515
	49.1555	45.7552			44.2952	44.0468			50.665	52.9252			38.5718	45.9348
	58.5501	50.3689			50.688	51.7533			44.205	44.4711			38.0369	35.1974
	53.2649	54.3489			51.1629	51.2158			36.9462	46.5735			53.6821	42.6671
	51.7409	52.8557			43.4707	43.6735			47.7045	44.1068			51.2465	48.4116
	39.977	48.9688			52.0298	55.5504			48.2084	49.5647			53.0588	47.8684
	42.4258	46.2545							47.296	54.7073			28.8096	50.2521
	67.114	61.2214							55.7404	41.9001			44.5134	45.8927
	46.4345	48.4296							45.954	47.0366			57.6803	55.4648
	64.4442	51.9147							49.693	51.6808			46.4887	48.5739
	57.6408	55.1967							59.0164	52.8967			63.6783	51.3961
	42.9653	51.4668							43.3807	47.7939			53.1306	51.7907
	48.6671	45.861							48.5725	47.9395			55.6601	48.0288
	59.788	52.7533							41.0647	44.9063			64.5463	53.4251
	55.1325	53.9312							47.158	50.2726			56.8832	47.6528
	37.3655	44.3512							47.2971	45.3602			57.2019	52.6385
	59.8852	51.9522							44.9266	46.1673			50.6488	55.6207
	33.901	50.9498							60.0789	47.7214			44.0174	52.7438
	53.4408	50.9317							64.3186	45.6425			45.5346	48.468
	62.1534	52.5976							47.5042	48.8215			43.394	45.4446
	30.2877	48.594							50.0625	52.4079			79.1051	50.4018
	57.4308	51.145							49.1828	48.3833			54.004	47.0874
	44.4196	53.325							54.543	48.5337			46.8786	46.5836
	48.3803	49.7893							44.9545	47.0612		Experiment #3	41.106	39.4287
	46.2151	53.2163							49.8253	47.1493			50.5788	50.2784
	36.1113	47.974							54.4278	56.814			45.4208	48.6159
	30.4793	51.3451							47.2331	51.2584			51.2481	46.4064
	37.9568	49.0512							43.1123	44.0876			58.1842	58.958
	40.0825	46.3825							59.9072	58.79			33.5845	33.1821
	48.2352	53.6231							51.6603	58.9854			27.9359	29.7047
	35.9494	47.5455							40.9682	44.9417			39.8932	44.4509
	40.1335	49.2576							45.6583	49.5921			52.2879	50
	34.6682	49.6311							52.3751	52.9281			51.9491	50.1301
	58.5839	50.7977							52.0816	54.9833			55.6393	48.7359
	45.2628	48.4868							36.4529	47.2267			45.3885	51.0412
	48.735	52.533							30.626	54.4448			56.1528	55.5027
	61.6161	48.9374							37.5573	51.3656			49.3326	44.8261
	60.3736	49.2868							50.7769	51.1648			54.2825	48.0167
	50.9549	52.0363							69.6985	52.1125			47.2049	48.0847
	37.2418	48.1929							48.8937	49.0388			45.746	47.3812
	47.783	47.1527							44.9127	45.4624			48.4336	45.9989
	59.2082	49.7111							41.4139	50.8999			49.9824	50.5905
	67.5378	50.5908							48.6111	54.5328			52.6457	53.7807
	33.4726	47.9346							50.752	54.0344			57.4697	52.8402
	44.6088	50.5465							32.0763	53.6619			56.3359	56.5499
	48.4531	43.2103							42.9947	51.1196			39.4173	47.2378
	20.2588	48.9279							44.4515	50.0505			58.5656	52.5535
	61.7588	49.2133							46.0181	49.9439			54.2354	53.1804
	41.1272	47.3441							49.8102	50.6573			37.1397	44.406
	54.8503	50.5777							49.6764	51.7236			47.0169	51.4098
	43.6134	46.5603							46.6609	51.8016			51.5207	49.3399
	57.2581	51.6508							60.1319	54.3336			44.4546	45.4032
	51.8886	48.7822							42.9706	47.8151			53.315	51.9713
	61.5496	46.307							47.3649	50.6736			47.9903	51.3724
	56.1095	52.911							56.3596	54.2335			42.4526	51.4502
	49.9418	47.8123							52.6406	53.3859			49.3266	43.3437
	53.8034	50.0364							43.1781	50.2535			49.9416	48.592
	58.9502	47.0654							56.5702	50.3515			41.1018	47.8678
	55.0099	48.8532							64.0455	49.7202			46.1865	48.3344
	36.3474	47.3432							49.8702	55.3797			50.5552	52.3784
	51.1144	50.2735							33.7922	45.699			42.4132	47.3831
	46.9127	49.0961							51.519	55.7904			57.703	51.5331
	53.8749	49.5981							55.1507	54.3711			41.3137	44.5165
	49.3975	48.0451							50.5152	49.0327			53.224	48.1145
	55.5811	49.9439							47.6218	50.8817			48.572	52.4575
	62.333	47.7124							38.2639	47.025			58.1439	51.5348
	56.8431	56.7638							39.5848	52.7264			41.247	48.1114
	60.5113	54.1065							56.2049	53.8338			52.966	49.7968
	50.6748	49.0594							49.4811	51.6155			47.9698	51.798
	46.9185	51.4928							47.0319	48.3986			49.3819	54.2285
	44.7354	48.9208							23.439	42.7988			55.5079	56.868
	35.541	41.5613							55.4415	53.973			48.698	50.89
	58.0779	55.6168							45.9769	46.7256			48.3154	44.9147
	62.6548	54.2528							46.0898	51.0729			41.876	48.1126
	51.5137	55.2832							46.7543	50.5042			46.9715	46.9555
	26.7037	48.3645							51.5398	54.0083			47.9066	48.435
	55.2713	48.8241							39.7217	44.5934			59.2405	59.0349
	37.0014	50.1059							49.5203	57.7126			49.1883	45.5872
	37.8437	47.9034							55.9014	58.0034			55.0205	53.0187
	47.6304	49.3671							67.616	50.5012			58.235	52.858
	43.3086	55.0952							39.8412	40.9524			46.9715	43.8596
	67.9448	55.812							50.1721	48.9109			47.2173	54.188
	54.0875	66.2537							52.0133	51.599			55.1143	51.0913
	51.9265	29.4309							51.2139	47.8032			50.2874	51.6677
	51.942	49.2972							55.5088	50.4864			47.7403	49.0653
	43.7999	52.8267							54.0212	52.0996			53.5853	53.2394
	45.2612	43.6566							31.3905	49.0181			57.8358	49.0856
	66.1961	51.5113							43.914	52.1977			52.2879	50
	47.7335	49.4318							41.8279	51.6696			42.416	45.8879
	43.9455	44.6198							35.8145	49.4857			56.5374	52.0024
	61.9093	53.8614							53.7851	47.0253			43.1316	43.2302
	54.0644	50.3471							51.6963	51.1582			48.8106	49.3517
	55.7988	52.1706							62.58	46.8828			46.4989	49.2155
	58.1461	48.7428							44.3106	47.3366			45.1414	45.3009
Experiment #2	71.2903	52.0855							27.206	52.8703			55.9643	47.5639
	56.0863	44.6034							49.559	52.9214			46.4766	47.5594
	61.762	49.4218							52.6018	54.6362			56.6981	54.3188
	52.5256	48.1378							37.2274	51.9694			61.0373	53.2393
	40.2503	48.1096							55.0978	47.0762			46.5729	52.9821
	60.5894	48.3606							49.3598	52.7951			57.3716	51.3606
	38.5521	46.8613							63.9989	51.1315			51.064	48.9276
	49.7105	48.3194							48.072	48.0029			44.7612	48.4452
	54.6716	53.5911							52.2998	53.0475			57.5079	54.3445
	43.1938	47.3113							51.7257	50.1258			41.3695	47.053
	58.258	54.9107							31.7088	47.241			35.2355	40.9706
	45.3749	42.9667							55.0959	59.2953			42.7512	50.6301
	47.2415	49.4463							58.1341	55.7564			39.526	46.6807
	39.5036	50.4117							59.7358	49.1327			62.5254	48.3726
	49.0284	50.0884							51.3071	50.0289			47.2049	48.0847
	36.1668	42.4032							55.6699	53.5792			43.4111	47.2883
	51.4689	52.3509							43.9465	45.5719			44.5549	47.5539
	49.8191	44.6203							31.5725	48.3954			46.1307	50.4858
	34.9896	51.562							52.04	52.6419			39.4794	46.5852
	72.589	49.5023							51.3406	51.2269			50.338	53.2213
	40.5989	51.5535							29.4348	52.2532			60.1558	56.1241
	47.7776	51.892							51.3788	44.7284			46.1208	47.7467
	55.4078	53.5059							55.9015	55.9493			67.2295	58.9949
	49.4055	46.9761							45.2215	46.0992			54.2946	51.5228
	50.5566	48.7033							41.432	45.0904			45.2727	48.9406
	60.2213	58.8937							63.3575	54.1706			58.9709	52.9125
	47.7687	47.5245							50.7149	51.6539			57.9014	56.2951
	55.2752	53.0388							52.7535	51.9947			40.7352	56.4151
	46.9517	52.3421							62.4695	44.8042			49.9969	52.3793
	51.4595	48.4335							62.9486	50.0786			54.2559	54.6688
	75.4825	55.309							50.1798	50.5588			58.0813	52.616
	46.9844	50.4777							51.7859	51.8987			54.5629	53.8237
	30.6366	46.922							51.6533	48.2507			56.7427	47.5941
	53.2946	50.3719							60.2523	54.7893			38.4764	46.9011
	69.4582	50.0995							42.3294	50.963			55.2127	50.4495
	40.405	45.8994							39.8724	51.5371			55.2773	51.7885
	58.513	51.4072							59.1835	51.5842			67.3654	62.5622
	48.6708	47.5914							53.1213	57.4206			35.1696	49.4763
	49.2622	50.5189							46.2379	46.6687			40.3819	46.7485
	34.761	44.6634							55.3017	46.2982			51.6824	51.3389
	41.3623	48.9135							51.355	55.2438			51.3186	51.3241
	45.4455	47.3962							29.5321	48.5592			56.4864	51.5198
	57.8612	50.2366							58.7746	57.1799			44.7431	47.968
	61.9371	50.9929							49.4247	51.9686			51.455	46.3939
	50.4731	50.5585							44.9145	46.8601			48.6923	51.0447
	39.7293	49.5412							61.8034	50.261			46.245	47.8064
	44.3107	45.2595							38.6232	49.9969			47.455	50.7675
	46.3064	46.374							45.8515	48.2219			49.9229	47.9138
	46.9871	42.7685							55.8874	49.5075			32.9767	45.3767
	44.3601	50.813							52.2669	51.8991			47.0013	49.061
	54.3905	49.7064							55.9201	50.638			53.0042	50.3121
	46.8632	45.0883							41.606	49.2607			43.639	52.3967
	51.6199	52.1209							51.3018	50.9093			47.3068	47.217
	65.8512	53.6005							46.6263	49.947			43.4848	45.8434
	54.3176	50.9349							53.7264	49.665			47.6518	49.1715
	46.8748	43.7178							63.8188	52.9731			49.7992	51.9379
	29.5965	48.0974							54.8241	56.5945			56.5567	46.3533
	46.3781	47.8236							43.2169	55.8935			63.6432	54.8355
	60.5464	55.5449							38.9247	52.7357			48.2225	52.2061
	36.8077	39.9434							52.4007	52.246			54.6682	51.5015
	64.1381	51.9672							42.1015	52.8176			54.1186	49.4599
	40.1969	50.0003							47.4002	48.9633			57.1602	55.5865
	53.9731	53.6118							30.1886	48.6541			67.7238	59.2903
	45.0528	50.8695							46.8493	55.2403			51.7465	50.4386
	46.5812	49.8794							44.3029	47.9225			54.8297	55.9441
	50.8172	46.2							57.5162	47.9452			62.558	46.7831
	36.3613	47.8838							39.6157	51.8343			48.6959	48.4259
	63.5596	51.6385							51.8463	54.4786			49.6688	54.654
	48.8235	47.0196							51.4876	48.4258			38.4927	48.4614
	42.552	49.8406							57.3893	49.5233			46.1714	51.5759
	45.2443	48.3436							34.0441	57.4181			51.2588	52.5567
	67.4394	52.2199							46.4574	48.4762			43.5036	47.4395
	52.0015	45.4006							37.1767	42.8169			55.8473	50.4483
	47.0325	48.982							45.4244	49.172
	49.1095	51.3412							47.7772	48.7071
	44.2365	50.9757							56.6937	52.9062
	51.079	53.1876							35.5824	49.3672
	49.7118	45.5305							45.0194	49.173
	62.1335	48.4013							53.0237	46.6475
	49.6286	52.7637							53.7409	52.4705
	39.2229	47.2415							37.0807	47.2346
	49.257	51.0876							52.318	55.5544
	54.9962	47.7498							38.8543	50.8143
	40.7934	51.3507							64.9097	51.6767
	35.8347	47.4411							56.7779	49.1493
	51.0332	51.1033							52.6073	52.6992
	50.1529	51.2547							47.1574	48.3846
	51.933	49.2016							59.491	49.5711
	43.8364	46.2619							43.5022	46.7178
	51.82	49.0135							46.24	46.8586
	33.7742	45.6816							49.7921	52.5929
	36.9063	45.61							43.604	50.2241
	48.7347	50.8417							56.4912	49.6888
	33.2823	50.605							55.9611	50.6064
	41.8845	48.7339							56.149	48.4611
	36.6625	44.6044							42.0701	40.2442
	63.8895	58.8852							60.0791	51.8426
	55.6689	51.9773							57.785	56.9471
	38.001	49.017							62.1539	53.9527
	35.1677	52.7152							49.813	48.1357
	51.5121	47.2577							44.9866	45.3399
	41.6672	48.5744							38.6492	48.1492
	48.1208	45.6955							45.65	47.0495
	42.812	43.5126							44.9924	49.2292
	49.2085	55.2773							47.8772	47.5558
	61.6796	52.579							15.9807	21.5254
	52.8065	53.2867							53.3816	47.1708
	50.3863	50.4847							39.9171	44.4008
	52.1677	50.2998							47.2757	51.3366
	53.2348	49.5957							45.0171	50.6192
	55.8586	49.1865							46.2007	45.7608
	54.7236	53.0866							47.1752	45.4012
	53.4768	49.4208							46.6249	49.4433
	53.8535	42.6572							43.0718	46.8499
	55.2993	52.0114							46.839	51.2799
	45.4643	52.9906							64.0154	50.9922
	50.3784	48.1965							56.8541	54.056
	52.0114	54.7286							49.1015	51.1255
	48.3732	49.456							53.3186	48.3217
	62.1986	54.8331							52.7743	49.5199
	56.8734	50.3337							52.1802	50.4305
	64.6329	48.929							41.0359	49.514
	43.7557	49.0551							44.6511	52.0336
	45.5398	45.2793							43.793	47.6302
	57.7156	50.9485							48.4026	49.4659
	49.8504	47.008							29.9668	46.2194
	58.273	55.8311							42.9404	58.9764
	50.1941	51.9189							49.4046	53.7463
	50.2537	49.7993							55.6545	50.811
	48.2126	45.4021							44.2201	43.7207
	69.425	53.7953							45.7263	46.3972
	49.4172	48.8081							62.0222	52.0123
	38.5203	54.0779							45.6379	48.7225
	41.3941	47.8997							46.866	49.6161
	44.387	48.3074							48.0087	50.3716
	59.8097	52.2322							52.8184	51.5882
	58.2885	47.8247							51.452	53.0707
	38.7642	49.3615							48.0971	48.4481
	40.6698	45.2406							62.2042	54.1497
	54.0303	52.4005							43.324	52.3083
	66.366	48.1341							45.4674	52.2182
	52.0366	48.9155							48.4772	46.5305
	53.1024	55.0632							37.0789	46.8947
	44.0423	48.756							61.8362	49.8721
	48.3809	45.1712							56.2554	52.6843
	50.3744	50.8914							47.3231	52.2909
	61.0256	51.8479							43.2788	50.9602
	42.6704	49.2286							53.7048	53.6379
	48.7442	48.4985							51.6906	60.2402
	65.7082	56.4775							53.7074	51.6579
	50.7338	50.2426							55.6423	50.4611
	51.8143	47.9269							43.6798	46.3251
	40.922	49.7791							59.0577	57.7349
	62.2792	51.7341							49.6535	51.8471
	45.1592	50.1713							25.9891	52.0803
	42.9233	51.2207							66.078	48.218
	58.049	51.3551							49.6424	49.8039
	46.3999	48.4592							47.7534	55.7144
	46.3779	45.5742							53.1043	53.1173
	67.583	49.359							48.9204	52.5008
	54.3745	52.1451							47.6527	43.7884
	40.2566	48.3226							46.9881	51.262
	37.3079	48.3814							42.1188	50.7026
	50.709	49.3702							59.8437	56.5139
	50.9108	50.8139							59.8444	49.9799
	44.7647	53.1347							48.5388	52.1157
	46.7942	48.8837							49.1449	49.7221
	50.4753	51.7608							50.2839	51.0059
	49.4153	47.0077							51.4043	51.3733
	57.1274	45.1574							44.5237	44.7931
	54.0028	50.8738							57.7962	49.8719
	78.717	57.2542							54.7989	55.7743
	45.3412	48.0094							41.6682	50.574
	57.4142	50.1009							56.9439	49.8335
	54.4312	51.2129							47.9564	52.408
	52.1322	50.9193							22.1329	65.1914
	42.3159	48.4877							41.4786	48.6616
	65.2021	49.6741							35.7557	47.7143
	46.5903	42.0289							48.6059	49.8389
	36.2434	51.1232							52.1445	49.3553
	45.6138	48.2383							38.2905	51.5574
	40.5033	38.2783							34.2253	54.4096
	59.9643	48.7569							36.5792	46.297
	56.2688	46.7604							46.7196	49.2871
	48.2758	50.5727							37.4587	53.7938
	38.74	43.5029							49.6442	52.2593
	55.0157	50.0338							57.8907	50.3414
	42.9682	48.3114							36.0787	51.7893
	24.4661	47.9566							58.6893	50.4104
	39.2788	45.8872							45.8176	45.7735
	73.7081	53.5253							57.1898	52.3062
	48.8486	46.9555							66.0298	49.6667
	63.5975	49.2636							53.8438	56.7153
	58.4408	51.6236						Experiment #2	49.2983	49.3951
	68.7512	49.2883							46.98	47.5423
	48.2785	47.2125							49.4147	48.2136
	49.1116	51.4666							54.4593	47.951
	48.7712	43.3454							54.4213	48.8939
	48.0578	43.3238							54.5401	56.8131
	46.8311	49.2152							57.1231	56.4407
	47.0159	51.3588							45.2463	44.0453
	36.2526	44.0786							52.111	52.5254
	46.3333	44.2375							49.8641	51.9228
	55.9318	51.7796							63.0765	56.0891
	34.4299	51.5703							50.4832	50.0708
	43.28	49.8821							51.4921	49.2877
	48.8093	48.3018							49.5064	48.6185
	56.9006	49.4508							50.6868	52.0452
	51.4653	51.7443							57.5737	45.4924
	52.0315	49.6399							56.1238	52.9756
	48.8354	47.7311							51.3995	52.546
	40.7941	49.1646							53.161	53.4643
	59.1845	52.6907							44.0708	47.6163
	56.0803	49.2158							51.8577	51.8286
	46.4552	43.5349							52.4252	52.9905
	54.7983	48.3515							56.3606	51.5996
	57.7635	52.6357							51.1441	49.6228
	55.2593	51.2726							52.4396	52.3554
	47.5473	49.2278							42.9452	46.6685
	51.8287	44.2115							54.1959	56.7942
	50.4465	52.5699							46.399	49.4273
	41.5016	47.5543							47.7395	52.6158
Experiment #3	54.888	50.2499							49.8705	49.5168
	39.8837	50.0077							50.141	52.0045
	46.5647	53.3113							46.4851	46.829
	58.0907	56.3195							47.6892	54.2605
	56.2163	53.2733							53.166	56.3574
	54.2536	54.1761							44.7886	48.7084
	34.6959	42.7157							40.8335	44.6872
	29.673	16.8639							52.0557	54.4601
	42.5926	49.2663							49.285	48.0302
	45.8469	50.2596							50.5967	51.1053
	59.9	51.0624							45.8639	47.674
	46.6748	47.2491							38.9596	52.1383
	48.4856	48.3484							41.2667	45.4429
	64.6803	49.197							56.8774	55.8527
	67.1749	46.5892							65.9945	53.4625
	40.9854	50.2508							43.075	47.5399
	44.2963	48.0206							46.9554	48.9769
	43.6912	45.3639							59.2613	55.6724
	51.769	51.5057							46.8989	49.3715
	46.8986	48.4512							50.0338	56.9503
	56.5769	54.4357							42.6394	50.4728
	44.4468	49.5906							53.2162	48.0473
	51.5096	56.1345							52.1294	48.5757
	45.5924	46.5759							46.4358	49.3059
	48.9939	47.7062							54.8106	54.8083
	50.3794	50.6958							41.5223	49.2275
	46.147	50.4662							53.4921	49.445
	54.9216	50.3177							59.3813	56.108
	54.2212	57.4575							55.1096	51.5312
	43.9726	53.9423							42.6386	53.0888
	56.1485	53.4106							53.1892	53.7619
	48.4458	45.9843							49.9981	57.0751
	38.9353	47.9782							43.3956	47.8059
	43.2754	51.1031							36.1524	45.2246
	50.973	48.6978							51.7886	49.8798
	42.9607	42.6385							42.6844	46.5802
	46.4472	48.0759							36.7391	49.0874
	58.2378	51.1429							55.958	52.7415
	51.5085	51.5309							53.365	50.0176
	54.803	52.8448							55.3835	56.3817
	56.9446	53.0222							51.2864	51.5426
	44.0771	51.1933							49.3081	51.7082
	44.4013	49.6278							54.2762	51.9714
	54.8376	56.1913							49.5668	44.726
	63.5526	56.698							51.4412	47.3922
	39.5658	47.5056							49.7117	51.6102
	52.4964	51.9474							37.3	45.5294
	56.1447	50.6478							42.1623	51.9063
	46.0523	44.4881							51.4512	47.9394
	48.3159	48.6442							68.7554	47.1243
	48.881	51.7996							49.0269	50.1836
	41.9724	44.0683							61.5166	50.111
	54.2266	55.2636							50.1381	50.2608
	50.1489	50.5759							44.0918	46.2166
	51.6387	49.3828							48.0466	47.5413
	49.8528	52.2051							56.5356	51.6624
	58.6848	51.1794							50.3918	56.6534
	57.7809	55.2966							43.3375	50.7268
	40.16	52.9175							49.8723	48.3364
	49.0914	53.4566							51.3212	48.7328
	49.2973	49.563							47.845	49.2155
	57.8463	56.3051							43.7377	49.1319
	33.8378	43.7605							43.8771	48.734
	41.3342	44.0459							54.145	53.5165
	40.9384	49.173							48.2912	48.5832
	52.3525	51.6633							44.6844	47.3211
	45.7626	47.8951							52.1471	49.463
	58.338	58.9599							40.1163	49.0986
	55.5942	52.2018							57.229	48.9677
	46.9751	40.7885							37.0145	47.6776
	43.9791	47.3598							63.1012	48.888
	48.9782	46.2182							48.7661	54.2169
	53.3602	52.0637							46.6769	47.6345
	50.6509	43.2735							51.6652	49.8812
	50.1949	50.0472							57.9589	52.8115
	66.3653	50.0277							49.1768	50.0402
	35.8503	48.6607							49.9576	52.1868
	56.0326	55.1645							43.3469	57.4717
	43.7838	47.8045							43.7958	48.4838
	48.1975	53.6692							46.7947	47.8103
	44.2122	50.945							55.3259	51.2123
	44.4746	51.7544							51.8261	54.0188
	48.3212	48.8818							56.1592	55.1337
	40.4358	48.4962							46.0847	49.6511
	44.7918	42.9538							52.6303	59.1606
	47.2723	45.2008							58.2122	45.7866
	53.1391	51.0493							51.3486	52.4389
	56.9246	52.4827							40.0087	49.3961
	42.0679	43.4385							47.3877	49.282
	43.2677	53.1577							50.872	55.9882
	53.5418	53.0808							58.4108	49.3299
	45.8195	51.7231							49.103	51.6628
	43.3798	48.6868							49.8414	48.825
	55.6404	48.3545							46.2046	52.0463
	42.4769	47.3907							44.3719	50.9207
	39.477	48.5371							39.6024	50.8051
	64.919	52.313							45.1062	48.7593
	33.2547	45.4992							43.7587	49.2905
	66.556	57.1937							50.3128	56.3453
	49.3712	49.0149							30.8421	42.4782
	46.505	47.5313							62.7638	55.2085
	45.5718	47.8834							53.9199	50.3775
	52.8896	51.6103							56.8739	57.4922
	49.2035	50.4727							58.1971	53.0422
	48.1142	52.9463							48.9833	52.5734
	55.5757	51.4377							47.0272	47.8092
	51.0417	52.0679							61.4822	51.0888
	63.1603	52.5043							45.3929	50.7828
	54.7328	54.9804							40.3231	40.9224
	45.4798	46.7544							46.0674	44.403
	38.7842	44.1867							40.0729	50.6691
	56.6512	50.5983							52.4243	50.7576
	56.7303	53.2242							53.6002	52.5498
	47.5117	50.3205							46.8644	54.127
	63.3116	49.848							55.7373	51.1625
	60.1699	67.0866							59.0401	50.4154
	54.8152	49.2636							67.0864	56.1116
	41.1474	49.8902							50.7653	51.3739
	42.0874	48.683							53.3402	49.4001
	36.2437	46.7115							59.2023	52.7551
	49.846	49.5133							49.0086	49.8293
	44.2582	49.7671							53.0611	50.1202
	48.2206	49.672							50.8649	45.0739
	68.0922	51.6302							55.6454	53.6377
	59.4949	51.843							52.2519	55.4357
	60.3298	52.3231							47.2846	51.7212
	43.8134	51.1813							55.8361	54.8868
	47.337	53.2954							52.2506	53.4177
	59.0719	42.3945							53.9779	51.4851
	57.9424	51.0084							58.989	56.9167
	51.8679	51.9903							51.2333	45.9789
	58.2071	53.4607							48.0915	52.3584
	59.4749	50.8145							58.5131	49.5768
	50.3593	51.3947							52.7338	53.2476
	49.8002	48.1358							53.3111	52.8713
	45.8814	46.7489							57.4224	53.1105
	41.9602	47.9519							41.7263	42.7844
	45.201	50.6306							55.93	52.7924
	41.8952	47.153							47.4154	47.92
	61.4756	47.4421							63.4552	52.5517
	44.6079	53.2558							43.9686	48.6469
	50.2844	51.3693							51.6229	50.1477
	57.7615	51.0775							45.6545	48.6313
	53.7542	52.786							50.244	50.3107
	63.2749	52.3685							60.7863	55.9838
	49.3122	50.56							50.9445	50.9722
	46.9587	48.7702							53.7687	53.3503
	61.0793	51.0429							47.4497	50.975
	53.1835	53.2758							43.5012	49.1833
	50.6295	52.3764							43.5677	48.7893
	43.4531	49.162							43.6633	51.36
	35.6409	48.7941							57.0751	50.1045
	52.0557	47.0257							47.3939	42.205
	66.9808	51.2467							48.0311	54.8092
	49.6139	49.4676							48.245	50.5689
	47.325	46.5512							45.8281	54.7292
	61.6612	52.6119							54.4004	53.9222
	47.2754	43.3551							52.9459	51.7797
	54.5006	44.4732							46.892	45.9743
	38.8505	46.743							39.4641	47.8542
	48.3913	48.1037							52.1089	51.0922
	47.2772	51.7363							38.6845	49.8579
	54.2491	58.2337							54.8173	53.6623
	53.6515	53.4856							53.8899	53.4705
	42.6427	44.0524							56.3567	50.4902
	33.5247	48.9233							50.1838	51.4515
	45.5687	44.1831							50.0918	49.2842
	48.9427	50.3546							56.0713	58.4899
	53.2538	49.6236							53.4623	56.9801
	43.7821	47.4922							46.0425	45.7279
	56.987	51.3329							57.8884	56.2047
	44.0848	43.4584							48.5514	50.4246
	54.2572	48.9737							45.9335	50.1354
	46.0664	47.9472							50.5879	53.4834
	50.187	52.1352							46.9656	53.1618
	58.1657	50.1151							47.0318	49.7596
	37.5229	50.3487							48.4015	48.2999
	53.6224	54.6964							37.207	49.789
	56.816	51.8925							56.8426	54.1595
	44.2276	46.3165							43.3208	47.9295
	52.9096	51.1317							64.1446	52.1719
	53.486	43.9641							56.62	49.1352
	68.0638	62.7994							55.6331	53.5082
	40.4842	45.1108							60.2873	47.9897
	37.4793	49.2023							52.2137	53.0076
	47.6431	52.5782							60.2261	50.9845
	36.2628	48.161							44.7482	49.7989
	53.8228	59.5015							52.9591	54.6809
	65.1182	55.8318							41.6097	45.342
	52.1819	49.3425							48.7947	43.774
	42.7121	50.3025							43.5618	48.4006
	54.4562	48.3882							52.2174	49.2051
	55.4139	51.2242							48.2442	51.9072
	60.7503	45.8299							57.3618	62.5292
	58.0426	46.2955							56.5005	54.2626
	39.3834	48.2974							57.3669	47.2349
	51.9959	47.9575							51.0709	53.1746
	45.5927	36.6753							56.6945	50.051
	51.4244	51.7774							58.4574	53.0368
	46.1479	52.9738							50.1264	52.6822
	45.9615	46.5597							53.9186	57.0451
	55.5874	47.3601							45.7153	53.0816
	63.2338	54.9163							35.8626	51.0152
	47.2106	47.6458							48.2439	51.5886
	53.4651	47.1082							55.0073	58.3118
	52.0009	50.0753							58.1838	54.5437
	52.0732	49.753							53.4505	52.301
	49.6247	43.3427							45.3854	53.4518
	53.3665	50.8812							63.6471	51.3686
	48.3231	53.7916							50.2715	50.0393
	63.0517	54.3842							44.2054	45.8044
	50.7372	56.1404							51.4667	47.4931
	47.4244	47.6878							45.3995	48.3397
	38.8799	47.9476							50.4755	55.3585
	44.1251	48.3398							39.3665	46.4385
	44.796	50.4608							48.3339	50.9016
	46.8939	45.3026							48.1354	50.8397
	49.5993	55.2525							56.235	55.7187
	33.9751	49.2328							55.0119	54.3824
	47.2187	48.8505							50.9983	54.5355
	55.6716	51.6557							60.4676	51.8583
	40.8282	46.8119							44.5395	49.8028
	50.7693	52.914							36.5136	49.9006
	51.7058	49.7799							57.2316	56.5808
	49.355	54.993							40.8578	49.8991
	57.608	48.932							43.6548	47.4865
	44.7253	51.3995							55.1683	51.8016
	69.0517	59.8348
	55.719	46.9633
	51.8777	53.3471
	50.1555	51.529
	57.5249	53.1499
	44.6276	54.9918
	47.5281	48.4873
	59.6167	50.7314
	55.7149	51.2564
	44.5323	49.4338
	45.5649	51.801
	61.4081	60.6521
	58.6034	50.1731
	49.2252	45.7182
	48.7426	52.54
	45.4463	53.2714
	63.8839	61.5967
	64.2398	55.6554
	53.096	55.3515
	52.5129	50.9214
	45.9279	49.6329
	54.2669	52.2997
	49.0129	49.8871
	58.4187	50.2627
	40.7774	51.2656
	42.3052	47.8816
	47.5272	54.5875
	46.5294	51.8543
	44.2241	45.4118
	51.7287	49.2669
	34.8957	47.952
	48.4191	49.7949
	61.3781	56.5077
	37.7592	41.2004
	56.53	54.4126
	51.3579	59.3063
	38.4301	42.1652
	52.5561	53.5514
	42.5008	43.4571
	39.4422	56.314
	46.5169	44.9195
	44.3353	51.6633
	52.5326	52.4274
	43.9019	49.6781
	51.5168	56.0604
	38.6722	42.6272
	48.9084	50.6781
	55.6817	54.406
	53.9425	56.0718
	40.7001	48.5268
	57.3224	50.7026
	39.8933	51.2225
	49.2287	54.3837
	39.5701	51.2153
	56.2736	54.9751
	50.6053	50.6842
	47.0951	51.5034
	36.6891	44.845
	27.3931	46.88
	42.0992	46.0025
	48.0169	48.9397
	49.3355	49.7138
	49.6864	49.3095
	42.3044	51.723
	56.0789	53.3465
	56.7161	53.1754
	48.8406	51.1819
	44.6855	52.658
	47.0845	48.9565
	44.3276	53.2725
	60.9506	48.2973
	39.0162	45.0244
	60.7982	51.0594
	46.5119	46.8494
	40.9874	43.9069
	46.7097	50.8527
	47.7177	47.2769
	52.4901	54.6779
	38.8284	49.0886
	52.4019	51.602
	57.2633	53.0722
	46.8418	52.8926
	49.3075	49.4991
	51.7681	49.0951
	39.8503	50.2916
	51.2083	49.7097
	44.2394	45.8651
	51.659	50.4766
	57.3204	53.828
	56.0727	48.9623
	49.8873	43.2059
	51.2122	52.7142
	53.7371	50.3829
	65.1147	51.9074
	41.0928	47.7645
	47.6348	51.6564
	44.7592	48.1409
	56.5756	54.0219
	51.2042	52.0133
	48.9244	48.8526
	45.555	49.4424
	47.7741	56.391
	51.2538	46.8475
	47.9602	50.8541
	55.5341	54.125
	45.6084	52.9048
	58.5049	58.9862
	37.9969	49.4417
	41.5097	47.1383
	39.71	48.7091
	43.3976	48.5654
	51.2298	51.2104
	33.1667	47.4629
	43.1842	49.7881
	53.6827	50.7414
	46.2137	49.462
	45.8364	46.3075
	47.8806	43.8865
	43.5305	47.5067
	47.3991	51.7488
	43.5269	46.8957
	55.6472	55.9952
	50.012	52.2198
	61.1005	55.8054
	48.1035	49.8287
	53.7664	51.9261
	51.5087	49.2973
	42.5772	47.7588
	44.7219	47.2006
	60.5499	50.9092
	45.9592	48.2461
	51.3197	45.0908
	39.6107	49.0725
	50.6658	53.2997
	47.1134	47.6594
	48.095	50.6986
	34.2444	47.1018
	52.8459	49.5411
	52.8897	50.4803
	54.5773	52.5367
	41.4826	49.0947
	49.4792	47.8964
	52.6723	53.7612
	36.9928	49.3996
	42.0462	44.2674
	45.2674	46.2519
	57.692	48.9566
	47.6447	45.0269
	51.8278	53.2782
	46.2529	50.9594
	57.2341	54.5516
	58.606	45.7867
	43.2844	51.4099
	53.0464	46.3086
	51.7122	53.5336
	60.5432	59.4029
	47.574	52.9012
	46.0132	49.0612
	49.3292	45.0383
	49.8362	52.9267
	38.8182	43.5284
	55.7011	49.273
	52.9165	51.7014
	38.8112	43.193
	59.4333	52.1173
	48.8678	51.4006
	46.6048	50.4536
	39.3977	48.8456
	46.7675	49.8167
	34.1852	42.4107
	34.1016	52.2871
	54.1304	54.0074
	49.0747	52.4428
	49.2209	53.0269
	50.4893	50.5115
	50.3826	50.7493
	37.7769	41.5625
	44.6619	49.8718
	49.5596	58.1931
	54.2021	47.7294
	57.0297	54.3467
