# Supplementary material for: Stochastic asymmetric repartition of lytic machinery in dividing CD8+ T cells generates heterogeneous killing behavior
Source: eLife. 2021 Jan 11;10:e62691. doi: 10.7554/eLife.62691 (PMC7867409; doi:10.7554/eLife.62691)
Supplement: Figure 2—source data 1. [file elife-62691-fig2-data1.xlsx]

## Sheet: Figure 2
fold increase of CD107a staining in the brighter nascent daughter cell as compared to the other nascent daughter cell.
	fold increase
Experiment #1	1.91729
	1.38472
	1.10776
	1.35172
	1.38044
	1.11321
	1.61163
	1.66923
	1.10959
	2.83495
	1.15702
	2
	1.19824
	1.66447
	1.72619
	1.45238
	1.85246
	1.44218
	1.01739
	1.29412
	1.4012
	1.51282
	1.25806
	1.18487
Experiment #2	1.15744
	1.16012
	1.01981
	1.53189
	1.37482
	1.35687
	1.12703
	1.47737
	1.07136
	1.21569
	1.38176
	1.51497
	1.58294
	1.02521
	1.29585
	1.25306
	1.44316
	1.84535
	1.03969
	1.41501
	1.53322
	1.19026
	1.33348
	1.93461
	1.48806
	1.30972
	1.42026
	1.22527
	1.12163
	1.63601
	1.05334
	1.01537
	1.17763
	1.79028
	1.88686
	1.68773
	1.41353
