# Supplementary material for: Stochastic asymmetric repartition of lytic machinery in dividing CD8+ T cells generates heterogeneous killing behavior
Source: eLife. 2021 Jan 11;10:e62691. doi: 10.7554/eLife.62691 (PMC7867409; doi:10.7554/eLife.62691)
Supplement: Figure 3—source data 1. [file elife-62691-fig3-data1.xlsx]

## Sheet: Figure 3
T-bet and c-Myc distribution between daughter cells
	all divisions				all divisions
	Distribution between daughter cells				Distribution between daughter cells
	T-bet	CTV			C-Myc	CTV
Experiment #1	43.7544	43.6651		Experiment #1	55.8267	55.6725
	49.5044	50.2264			47.3599	45.7949
	39.7334	43.6647			46.6295	49.7488
	45.8552	46.4195			56.0426	56.8448
	45.2749	43.3666			50.1193	49.7504
	46.5435	47.248			47.1977	46.5806
	43.6293	48.6641			49.102	49.6431
	49.6828	50.1564			54.3784	53.4074
	56.3889	57.3062			44.1147	44.056
	48.672	49.4064			49.2862	49.899
	46.6859	46.9969			47.8583	48.7364
	48.6248	48.842			49.3836	49.3308
	52.7339	53.4912			48.5968	49.0559
	48.7886	49.1233			49.4059	50.8436
	46.6236	47.5557			46.0277	43.9256
	46.7426	46.3477			56.6034	58.7313
	38.1056	41.3797			50.696	51.9197
	50.0835	50.1528			53.1231	51.935
	51.708	52.9455			51.4316	52.5089
	53.3095	50.1057			59.522	59.1698
	53.1403	53.1127			48.6136	51.0401
	49.7322	52.1865			47.6575	48.5057
	51.277	51.1457			51.1689	51.5917
	52.9418	49.6277			48.6917	48.5008
	50.0989	49.0409			52.5535	52.1913
	53.5408	52.2684			55.5134	54.7713
	49.3324	49.5903			51.0402	72.9342
	51.2123	50.4558			50.0064	52.1628
	54.0791	53.1751			45.5438	45.8271
	50.4621	51.4647			44.2894	44.9095
	47.2526	48.9312			49.1582	48.9534
	51.9669	53.9617			47.419	47.5447
	51.9755	48.5184			58.4398	58.1714
	51.7096	52.7209			52.66	51.5869
	46.5149	48.4058			52.2271	51.9377
	46.3544	45.6035			49.4041	50.3043
	52.4269	52.2464			55.2933	55.9247
	48.4555	49.1163			51.4249	50.215
	53.1946	52.4982			56.2616	56.0627
	48.3889	52.6665			47.5237	48.8274
	49.3972	51.308			56.7022	76.7235
	50.7763	49.9832			41.3717	41.7729
	52.7092	49.754			47.8339	48.2317
	44.3437	47.7985			48.692	48.4545
	48.5069	48.4365			52.973	52.9332
	48.1861	49.2966			47.8648	47.4953
	50.449	50.6542			52.1268	50.8368
	46.7535	46.5443			53.7953	53.2319
	48.7025	46.4086			48.6498	50.3076
	49.3471	50.3898			51.7025	53.2052
	49.8837	52.3843			47.3294	44.9642
	45.3759	44.9914			55.5101	53.4528
	51.2614	51.5356			48.3481	47.3319
	54.1955	53.1441			50.3424	50.7485
	46.9356	48.4633			58.142	59.5609
	57.7594	53.9949			52.8301	53.8562
	48.6972	47.6615			51.9087	53.0385
	53.5184	53.6858			50.9031	51.5856
	50.0004	51.4509			44.8622	47.911
	48.6215	49.4608			50.4984	50.4443
	45.9376	44.8898			54.2452	53.2493
	49.4025	49.3039			49.3965	49.9152
	50.2743	50.2457			52.9822	54.4799
	47.7677	48.4211			58.0304	57.7514
	47.7893	46.7788			47.1516	49.9203
	49.0222	49.3571			58.0644	55.4844
	49.3854	50.5304			49.2762	51.2547
	56.8898	54.3908			53.9848	50.281
	50.4504	52.1703			54.2734	52.426
	50.3119	49.5211			51.2218	51.8127
	47.6753	48.955			44.7529	46.7194
	51.7807	52.4772			50.3681	49.9639
	54.3392	53.3598			54.3654	54.9216
	47.7423	48.2276			52.9442	51.4248
	50.2654	49.2748			50.7025	51.6104
	49.5013	50.3599			49.0916	51.8322
	47.1428	50.9198			51.8294	52.0648
	48.0843	47.457			49.661	50.1059
	63.2629	59.9694			52.9359	50.9364
	51.5791	51.5105			50.7588	50.6331
	52.0311	53.589			55.3665	55.8033
	48.0104	47.5689			44.9023	46.0135
	47.8156	46.4461			46.8903	47.8273
	47.0865	47.5686			50.7109	51.3396
	52.8821	50.9278			48.0338	49.9361
	47.2984	47.9648			43.7147	43.3202
	53.5273	54.0156			47.9002	48.3554
	49.3125	46.6819			55.622	53.1871
	53.0991	51.6147			55.2209	54.1333
	47.6857	46.5237			51.6177	53.0371
	44.2582	44.4034			49.3249	48.7114
	53.4107	52.7321			48.206	48.5059
	48.8887	49.4077			56.0964	56.1041
	46.6218	45.1015			52.7308	53.8163
	51.8968	52.613			45.795	45.7407
	52.628	52.6779			44.9303	45.0594
	48.9938	46.3413			56.136	55.7744
	46.8135	46.2572			47.0061	49.7817
	47.6515	46.0771			50.5484	49.8496
	50.9339	51.9806			43.3177	45.2257
	46.8316	48.0202			56.0671	57.047
	47.6645	48.2476			53.2331	53.0489
	44.6439	44.4265			51.2211	49.9553
	45.6798	45.8461			44.2799	45.3716
	51.9042	52.3357			52.79	51.9433
	47.9143	50.937			50.8442	50.7519
	49.8739	49.2196			40.13	41.5518
	54.4894	51.6556			53.6565	52.9138
	45.427	46.8043			47.006	45.7787
	48.3169	48.9554			51.1064	50.9506
	52.9474	53.7467			54.2934	53.2923
	46.43	48.8927			52.9379	55.1158
	53.9687	53.2283			56.0115	54.7174
	49.8844	49.2061			55.144	54.8949
	43.5416	45.6567			50.397	50.4239
	50.166	50.5002			51.8259	50.855
	49.3178	50.706			49.5511	50.9184
	50.6873	51.5661			52.1844	52.0458
	53.77	53.7713			54.3606	54.6237
	47.6803	49.1224			45.2577	46.5646
	48.8581	45.5027			50.0578	50.0838
	45.6149	48.427			47.8599	48.4823
	47.4144	46.9135			51.1229	51.4082
	51.0948	50.4152			47.2986	49.1677
	54.8025	55.6972			47.9952	49.544
	53.6388	50.5116			54.7245	54.807
	55.5918	54.2752			52.7368	52.8998
	43.8063	47.6331			50.6245	51.6115
	51.3347	51.2744			43.9876	43.6841
	42.3252	40.2164			53.9081	52.533
	53.5225	54.096			49.6145	50.0057
	46.8157	47.7955			48.5965	49.735
	47.4548	48.4419			54.2363	54.9677
	45.3373	44.6435			49.4746	49.9011
	50.4437	52.0548			48.0681	49.0115
	53.683	54.5592			56.3971	53.587
	48.8352	47.356			47.5758	48.5319
	48.3391	48.0267			47.7832	48.1927
Experiment #2	51.6326	51.903			52.6766	51.8541
	51.2328	53.4264			46.0905	47.3188
	51.4773	51.4459			48.8906	50.2087
	59.5444	61.234			51.3053	53.7574
	47.3489	44.8287			41.728	45.2145
	50.4291	52.1116			47.2766	47.6306
	47.8383	47.4908			47.2705	48.1387
	51.912	51.0815			53.464	52.8345
	52.9571	48.3758			50.3557	50.8013
	45.9779	46.5626			54.2757	55.5847
	49.2143	53.0348			55.0992	54.5123
	45.6669	46.1933			44.5371	45.7704
	48.0551	47.8728			52.8693	51.4987
	46.5322	48.7666			48.6774	49.5486
	52.4669	54.0346			49.6848	48.8696
	49.1274	49.6424			49.9002	50.3106
	48.3065	52.1829			53.7112	54.2275
	50.8492	50.238			50.4382	50.6985
	52.3352	52.3611			51.0618	50.9863
	50.6161	48.4536			54.8165	53.9883
	52.2618	54.9441			51.7992	51.9966
	53.465	52.9095			53.7286	52.6137
	54.9123	53.9481			51.5659	50.662
	49.6345	51.0234			51.5575	52.2002
	46.7187	48.2981			54.9007	53.9803
	52.5804	51.7848			53.5405	53.5732
	55.3112	54.0382			55.4965	54.6833
	50.0143	50.4106			47.0459	48.7178
	51.5031	49.4058			53.8858	54.2973
	53.3465	54.8091			42.5205	42.0267
	51.9281	52.225			52.2548	51.3243
	53.6712	50.1216			50.1702	49.7348
	48.7432	47.0948			49.1536	50.2075
	56.0297	54.5027			56.1517	57.5592
	53.229	51.2162			51.5452	50.4655
	52.6683	53.4382			43.415	44.9185
	53.3291	52.6747			54.1779	54.5149
	52.9444	52.5664			49.3665	48.4555
	49.0763	51.0738			43.6905	46.9797
	50.3443	49.309			52.4817	53.4355
	53.5459	54.3609			51.7768	52.8366
	50.422	56.3057			52.6805	50.7859
	54.4121	55.1945			56.216	56.5521
	53.7369	50.9494			54.639	53.0948
	56.1011	56.6162			51.7226	53.4933
	40.8014	43.7274			49.0659	48.5382
	57.1274	58.4081			56.8108	56.3707
	49.9003	49.9076			47.2538	48.6006
	57.4422	53.7376			49.6091	48.9924
	53.5263	51.7691			50.1326	46.8238
	48.5805	47.2984			48.0911	47.6381
	51.0555	52.1687			59.3575	58.9709
	50.7268	50.5744			53.4201	53.3257
	49.7297	51.7215			51.3309	50.0766
	45.673	46.765			51.7988	49.9246
	55.9504	54.1036			45.9854	48.0889
	50.568	50.5611			49.5941	50.6846
	46.583	44.4419			48.5228	48.1872
	56.2989	54.8441			47.272	46.3633
	50.4656	49.946			49.4563	49.8538
	55.5583	53.5386			53.316	51.4843
	48.9099	49.8864			51.6036	50.8537
	53.1312	53.4315			48.4515	48.7647
	50.0934	48.3711			44.5664	48.9099
	45.398	45.1639			49.8107	50.5947
	55.1518	54.8968			55.2006	52.635
	47.4094	48.017			49.9437	50.8214
	48.0202	47.8317			50.0535	51.0073
	52.2345	52.5004			54.4551	52.8867
	48.535	48.4505			48.7335	49.1722
	44.0766	44.747			53.1032	53.412
	48.6968	50.2171			50.1428	49.8436
	69.2095	80.9201			52.882	53.3846
	59.3461	57.8808			50.9233	49.2155
	44.7383	48.2382			46.3739	45.2654
	52.9075	52.0891			49.9622	49.6295
	49.5433	50.0163			52.1015	51.5235
	49.9087	49.5831			45.6867	47.4448
	44.8308	47.8293			52.1198	52.4756
	60.5445	58.3841			46.3304	46.3597
	49.4798	49.1168			54.9601	53.7294
	54.2399	52.773			52.4605	52.4464
	46.2473	47.609			53.6124	55.3111
	52.0768	50.9639			49.3675	49.7796
	54.2962	53.6974			46.1725	47.1825
	41.0974	45.4642			52.2438	51.977
	43.225	45.8076			50.5603	51.6423
	49.8597	45.4549			50.3624	50.6714
	50.365	51.8715			48.8522	46.3978
	49.1557	46.1886			49.3415	50.6092
	52.7078	51.7376			48.4835	50.9787
	53.2034	53.4978			51.3472	52.4124
	48.0925	49.8482			52.9314	51.6081
	52.7732	53.5783			51.9895	52.4653
	45.4607	47.8266			49.96	48.6354
	49.8026	50.7291			49.2127	50.0352
	39.078	49.2024			46.2178	46.2756
	51.0263	51.9288			51.4804	50.92
	48.9467	48.335			48.0931	47.997
	52.5647	50.7516			51.0622	51.7684
	52.5709	51.3422			52.1923	54.1145
	54.9604	53.6502			52.4501	52.3144
	46.3669	49.9122			52.0863	52.4761
	51.8211	51.9667			53.103	52.3323
	55.2016	54.7475			53.3408	54.2338
	48.2231	48.0235			55.9066	55.8813
	56.0082	52.1383			48.0983	48.8181
	57.8315	57.0248			52.1513	50.6879
	51.0269	51.5618			51.3819	53.0366
	48.493	49.5596			52.7466	52.7474
	54.6181	52.7719			43.6346	44.9129
	47.9191	47.7875			49.4947	51.1585
	59.3888	58.5728			49.4966	48.604
	48.7084	46.3012			46.5628	47.3625
	55.3595	54.44			52.7472	51.5523
	53.714	51.3828			58.3036	58.6126
	45.865	47.8855			54.1359	52.2179
	45.9065	46.8756			51.5776	51.594
	57.3453	55.1013			47.4749	47.6215
	52.1889	53.8404			53.6384	52.6136
	49.2567	50.6601			47.4851	47.9023
	48.7952	48.8165			53.6943	52.2367
	47.0385	47.4432			49.7797	49.2528
	50.2571	53.5179			45.0136	45.5347
	55.4879	54.4347			49.2103	51.176
	48.3153	47.8288			55.0746	53.8186
	53.9198	50.646			53.1214	51.7282
	54.7689	55.4358			47.2011	48.9699
	55.1029	55.6115			52.5017	50.1468
	53.497	53.1017			47.2613	47.993
	48.8818	49.7362			49.7375	49.3051
	48.0588	51.6351			55.0303	54.1407
	54.9092	53.3042			49.854	51.0826
	51.1955	50.7099			45.8052	46.8615
	84.0454	85.1451			50.6945	50.7627
	52.6202	51.2974			49.7962	50.5292
	48.5862	51.0839			51.8229	53.9935
	60.6496	52.7177			46.6678	46.6236
	48.7996	48.4634			62.2502	61.1086
	46.0944	49.4383			50.855	52.4311
	58.6566	56.2058			50.5696	49.4731
	49.331	51.2778			50.8358	52.2638
	47.8361	47.9522			51.5777	46.9672
	42.1048	47.1035			50.8096	51.9474
	60.6421	54.9647			58.7373	56.6039
	46.3122	49.4407			51.1598	51.5971
	54.3223	52.4093			53.3528	53.5601
	52.7255	51.7114			42.3001	45.2877
	46.3811	47.1673			50.8993	52.8299
	57.5372	53.6555			51.7035	52.0597
	50.8039	52.7193			44.1191	44.7655
	52.5392	51.7512			53.5538	53.2788
	44.713	46.1901			49.5061	47.6568
	48.345	46.3492			48.1759	47.9852
	50.3316	51.0794			53.1087	52.5509
	54.1021	51.8547			52.5938	52.0393
	49.0129	53.1659			50.4009	52.1069
	46.4429	46.7566			50.9572	51.165
	50.1874	50.6473			49.495	49.4091
	49.9615	52.15			47.1742	47.6896
	41.7802	44.7175			48.8547	51.2244
	50.8367	48.4685			48.2876	48.159
	47.2344	46.7087			50.4145	49.8845
	52.5142	53.4396			50.766	48.9247
	54.2235	53.8793			45.1993	47.1912
	57.6916	51.7818			54.0848	53.2096
	54.2498	53.4553			52.4554	50.6558
	48.601	49.6479			51.0835	51.0738
	49.6519	50.4081			48.1619	48.6922
	47.3352	48.9522			50.0898	51.0437
	49.1805	48.0926			49.3077	49.3472
	59.1281	56.4847			50.2901	50.7796
	53.3945	53.3455			56.3258	56.0604
	55.0247	56.3459			52.3068	50.8007
	51.6942	52.0929			52.1389	52.4601
	44.702	48.093			51.4773	51.7187
	48.8819	53.1633			52.1457	52.7764
	39.1084	47.9348			50.7116	51.1514
	48.6603	51.9564			47.8267	48.6549
	47.8927	47.3831			54.9313	53.8204
	48.9202	50.8308			52.5255	52.1124
	49.0842	48.1358			53.6047	53.9577
	52.8197	52.9573			51.6817	49.7333
	49.1882	49.9285			50.0637	50.4926
	40.5926	43.772			48.6671	49.2341
	53.996	53.6513			57.2932	57.0657
	48.4389	50.1837			50.7537	51.6527
	47.8778	47.3736			54.3721	54.1337
	53.7114	54.4066			51.104	50.3437
	56.2284	55.3719			46.2272	47.1067
	54.5971	52.8513			49.0622	47.6983
	49.1941	48.6522			53.7043	53.6505
	43.1566	43.9061			44.4625	45.061
	53.2273	54.0693			51.8661	51.501
	59.5418	55.5753			52.7049	54.3755
	50.2098	49.8125			49.7558	49.9613
	44.1172	46.1535			49.5637	48.8836
	52.5635	51.4666			48.2603	48.8205
	55.1513	53.4641			54.1712	55.0934
	50.9579	54.9348			48.7871	47.7647
	46.5779	42.9462			55.5547	53.7055
	50.5896	52.5671			46.3246	45.9694
	51.0291	52.8182			60.0243	58.1563
	56.961	55.7718			51.6223	53.5346
	55.8215	54.2971			53.747	54.6343
	50.1819	49.2096			52.685	55.5947
	40.6556	41.1504			48.0589	48.1859
	49.9989	49.3622			58.0523	56.1204
	45.9647	46.1862			45.311	48.2535
	54.365	53.7987			54.8868	54.3368
	52.0962	53.6734			50.0599	50.233
	46.4106	48.9776			45.3426	45.8817
	50.4106	50.3399			51.5294	53.4839
	46.0614	49.5335			52.0546	52.2171
	49.9254	52.9309			55.1034	53.7657
	51.1123	52.9754			55.3394	58.8754
	42.4334	48.0981			46.5153	46.6516
	52.9832	53.5131			56.3464	56.4246
	48.6404	50.7117			56.0968	55.0174
	49.5355	54.9307			51.4369	50.7459
	55.2501	53.4321			53.2653	52.6409
	50.8535	50.7733			51.5293	51.5819
	49.2361	49.511			52.8268	52.9646
	46.3604	48.6602			48.1264	48.9664
	49.5819	50.9092			49.4555	51.3996
	44.0075	46.5442			51.4636	52.3062
	43.9922	49.4439			48.4907	49.5299
	48.6111	51.2049			52.5187	52.7223
	49.4718	49.9992			56.0013	55.9433
	55.1959	49.9258			52.6497	52.4403
	51.1773	50.8399			54.0613	54.1002
	51.5965	53.6117			49.3999	48.4866
	43.3366	47.0254			52.3138	53.2837
	48.8784	50.274			51.2775	52.5173
	47.3775	49.9439			48.2939	48.9872
	43.8579	45.3883			46.2172	50.703
	54.9189	54.1744			47.8177	48.1895
	51.7678	53.1613			48.9418	51.0194
	57.2141	55.5171			40.1322	40.1519
	54.4744	53.782			48.2596	47.4278
	46.3594	48.1797			55.1555	54.4272
	51.0818	49.9018			50.223	50.1059
	45.5071	50.1012			48.7415	50.1744
	50.5308	51.2865			46.4645	45.8021
	59.7684	54.6141			50.1759	51.5829
	49.2213	48.9328			45.9514	46.9621
	53.5075	55.91			53.5449	53.3435
	54.0505	54.0651			50.6708	52.4539
	46.3599	48.3861			48.3667	49.3042
	42.5594	45.2506			44.8868	48.4352
	60.5566	56.7647			48.7871	48.8235
	58.4942	55.7417			50.9498	51.5973
	55.265	53.4015			51.8743	50.9393
	46.4438	49.9548			48.8532	50.1128
	53.3767	57.3054			45.093	44.4781
	51.7973	52.1896			52.3051	52.9564
	56.7762	54.6801			55.1888	54.9279
	48.7526	49.0196			46.0001	43.7509
	52.662	51.2948			52.6844	53.4936
	52.4316	52.03			50.7532	52.7087
	52.2514	51.8095			52.6415	53.8812
	45.8965	49.5745			52.3388	53.8972
	50.9328	49.7466			51.0198	50.3845
	52.5596	49.638			49.0089	49.2332
	55.3194	53.2468			45.2635	47.3189
	55.4961	53.5462			61.7403	61.3425
	50.2393	50.444			55.5992	55.549
	49.7397	51.0589			41.5888	42.5694
	49.4867	50.1202			48.2556	50.6535
	55.1318	51.8076			46.791	46.677
	55.1292	51.7512			49.2818	50.151
	48.3807	49.0651			53.525	54.3613
	50.8767	52.1639			52.4467	52.9201
	49.2973	49.4481			47.1499	48.4572
	46.6246	46.025			49.5302	49.7679
	47.9787	50.0066			51.4784	52.1167
	42.1996	46.5008			47.7809	46.3681
	53.927	52.2585			58.4287	60.5989
	49.4298	49.4897			46.9647	48.1134
	55.1284	52.5547			50.2961	49.3149
	49.8773	47.2881			46.3781	46.8244
	53.4207	50.9657			53.3978	52.914
	51.4458	50.3369			41.43	42.746
	47.2262	47.4058			52.4295	52.6183
	43.8225	45.6836			53.8542	54.7652
	51.6938	52.3792			55.0864	53.7691
	51.6166	50.8595			56.9428	56.0662
	45.9295	46.6121			49.1219	48.0633
	54.499	53.7984			51.8124	51.2175
	50.6156	50.9866			49.0206	49.4515
	49.4308	50.9574			51.5227	51.1139
	55.6513	54.7426			50.2312	51.1024
	49.779	50.7953			53.1286	52.624
	55.1818	53.5032			52.366	52.7721
	46.8793	48.2427			52.4731	51.4936
	53.0895	54.3101			55.9149	58.0657
	48.2831	46.5923			54.4913	55.3947
	55.7673	58.7411			48.5208	48.5627
	52.5928	52.0629			49.6321	49.9527
	51.3834	53.0216			48.1563	47.9639
	47.0052	46.1838			49.028	50.1682
	54.2989	55.8926			50.6531	51.6098
	48.3477	47.8584			47.3468	45.9648
	50.01	49.6248			50.1021	50.9154
	56.0435	52.7861			47.1161	48.4103
	47.5898	48.3848			54.1305	53.9343
	51.5037	49.2178			49.7545	50.5893
	47.3439	46.0877			48.2677	48.6834
	46.8824	46.9214			48.8386	49.9428
	46.3528	48.2314			44.8339	44.8115
	54.4498	52.293			50.8795	50.6308
	45.8284	48.2601			47.8334	48.0756
	47.6437	49.5816			55.1577	52.602
	51.571	53.1665			48.8794	51.8879
	48.9099	49.8947			50.1266	49.8811
	51.2959	52.5552			55.131	54.0292
	53.0585	51.6854			47.883	48.5794
	51.3198	50.7091			50.0862	49.1511
	43.868	45.2058			55.7851	55.5077
	47.7468	49.6274			52.4833	51.5115
	45.8852	49.1678			55.9506	55.7343
	48.7558	48.6648			50.7537	49.172
	51.7845	51.2867			49.1378	49.1549
	57.4753	55.9262			54.0131	54.7348
	48.1872	48.8138			51.7411	50.3599
	48.204	49.9115			47.3553	48.2191
	52.0369	54.1354			47.4903	49.774
	51.1999	51.375			43.1578	45.1083
	52.4834	53.4019			51.2269	51.1897
	43.8337	47.8074			47.4529	49.1119
	53.1658	52.4756			56.673	54.8065
	45.7298	47.9492			49.6777	49.2889
	60.5014	59.3065			49.9337	50.4764
	48.5015	44.8189			51.9987	51.6619
	57.5318	57.0283			46.2343	46.7188
	54.6116	55.0399			45.5963	47.492
	48.8433	51.1321			51.8291	51.1406
	53.0935	52.8478			52.248	53.0408
	45.9265	48.867			49.102	49.6907
	40.7613	45.7394			47.579	48.6872
	50.94	50.4528			45.3473	47.9635
	47.0965	47.6537			49.2211	49.2699
	44.1432	45.1801			55.5902	54.5038
	49.5394	50.523			56.3481	55.9068
	55.408	55.3485			44.6667	47.3303
	43.5517	45.7983			51.4984	52.5783
	53.7166	52.4205			54.1838	54.056
	48.4194	51.4652			45.3634	45.4464
	48.6072	52.2352			45.7028	45.5032
	44.8002	45.7559			50.8864	50.9195
	55.7065	55.0288			44.7222	46.3526
	46.0892	46.7302			55.3251	55.175
	53.6855	55.793			49.701	49.7525
	53.9506	55.166			44.0199	44.4073
Experiment #3	49.6087	54.1501			45.8222	46.07
	54.0475	53.6626			50.1463	50.3685
	49.1667	49.3692			45.4737	47.4097
	48.0819	50.9486			55.617	53.9231
	53.0972	53.0741			47.3853	47.2753
	47.72	47.0129			48.6646	48.8038
	51.1804	50.7901			48.4469	48.8189
	51.556	51.6133			52.5892	51.7196
	50.5837	50.1006			47.2446	48.5286
	49.1812	51.308			54.2532	52.8802
	52.6166	52.69			46.842	45.1796
	50.3729	52.7729			55.0772	53.2738
	49.1364	51.3499			49.0854	49.5647
	53.1001	56.2501			50.7573	51.3586
	51.5812	53.9849			49.6798	49.5479
	51.9468	50.087			50.1519	50.6505
	45.4965	45.6387			50.2502	49.4866
	51.4967	50.0188			53.9707	52.8749
	51.2038	51.1878			51.179	51.4016
	46.9868	45.8426			47.1705	48.1784
	47.8796	47.8045			35.4424	40.8963
	51.1067	50.7064			51.1747	51.019
	47.8623	47.1348			47.6784	47.5862
	56.3545	58.2187			50.2555	47.5087
	61.1048	57.1354			56.8181	54.3815
	51.9634	52.3229			47.5581	49.4583
	37.0836	44.9458			53.0949	51.7595
	34.1203	37.2345			51.6877	52.2747
	50.9925	50.9843			52.2037	52.9036
	56.2915	52.733			48.2183	48.2852
	44.246	47.1114			51.2828	50.7938
	47.2054	49.2836			59.0115	57.6898
	47.4267	50.4104			55.8869	54.9784
	52.2824	53.4786			52.3468	52.0662
	48.2711	47.3093			50.6992	49.4158
	48.5395	50.1065			50.9411	51.1825
	46.6686	46.6692			50.4455	51.0173
	51.8734	51.6866			49.3715	48.0825
	45.8166	46.7293			50.3803	51.003
	50.0035	49.4371			50.7846	50.0483
	49.0234	52.3539			52.7074	53.3114
	56.7322	57.1978			53.4584	52.0779
	48.8448	43.6667			52.4621	52.9142
	48.1318	50.501			55.8861	55.8461
	42.5696	46.8036			49.0719	48.8307
	41.7323	45.8386			48.1637	47.9717
	45.899	49.5673			52.879	54.4012
	51.6735	53.365			54.2249	53.625
	54.5476	56.8012			51.6581	51.3913
	49.7564	51.1442			48.6958	50.4009
	52.0377	52.5673			46.52	47.5728
	54.9013	54.2027			50.302	50.2857
	56.0229	56.9217			50.4844	50.6032
	50.1485	49.72			51.6492	51.488
	44.6953	46.565			49.8772	49.4923
	49.0537	47.6519			50.4733	50.1034
	47.6635	48.883			50.2256	50.2913
	42.3774	45.0763			47.9954	49.2276
	54.1786	53.5141			50.0783	52.7983
	51.1838	53.0004			54.3094	54.5914
	51.3733	52.0715			48.2367	49.6635
	53.9912	53.8113			58.5406	56.9559
	47.4376	47.6874			51.8167	53.2678
	52.1031	53.8804			45.8701	46.6994
	52.6364	52.016			54.2594	52.8635
	52.3171	54.813			48.7825	48.8283
	54.466	53.7331			50.7261	50.8447
	53.2737	52.9165			53.1595	53.3869
	44.7147	47.5721			53.8694	52.478
	53.7624	52.645			52.3673	52.4939
	43.5562	53.1215			55.3969	54.742
	46.9331	48.1526		Experiment#2	47.2666	48.0854
	50.5359	53.7829			48.376	49.0873
	46.919	46.7799			65.0377	62.3471
	40.9704	45.9698			47.7617	50.2897
	48.0366	50.8054			50.4986	51.3761
	43.2311	45.36			49.2734	48.3346
	50.5212	51.4311			48.6494	49.4305
	53.3592	51.8047			50.9354	49.8819
	43.1837	47.1222			54.9388	54.6336
	48.3111	50.3938			52.7474	51.4222
	49.9266	51.4251			53.6154	53.5583
	57.1039	57.439			54.7282	52.3554
	56.6053	54.8986			49.7357	48.9241
	52.9635	50.2278			48.1045	47.505
	50.1489	52.0245			47.682	48.3278
	33.8524	25.0697			45.8153	46.6928
	56.9718	55.3151			50.2155	51.5819
	51.8501	52.4644			39.5437	47.5445
	51.4306	51.5983			41.3311	43.651
	52.238	52.006			47.0635	49.0078
	54.37	59.2107			51.9844	49.1629
	54.2593	57.9676			48.8808	48.5858
	51.7321	49.7995			50.6799	50.6634
	44.7614	48.3754			43.0473	44.7082
	58.7483	57.7908			44.6168	47.135
	53.6779	55.0945			49.0556	50.8402
	53.1001	56.2501			51.132	51.8328
	44.386	49.52			54.4881	54.8803
	47.8146	50.0959			47.5902	45.9059
	55.7291	55.2493			47.3745	43.5353
	46.6818	45.4076			43.1217	37.6858
	48.3965	50.8088			52.5201	51.7756
	46.0738	45.973			51.9685	51.6513
	52.0755	50.2578			45.7067	47.1499
	57.8703	55.98			50.4228	49.6962
	43.3687	48.2093			50.2247	50.535
	41.5254	43.8617			55.7886	70.6542
	50.0534	51.1412			48.0431	49.3107
	46.4551	48.2882			53.347	52.031
	53.9726	54.044			52.7078	52.6878
	50.7186	53.4602			50.2417	50.9115
	51.1535	49.6438			48.0881	47.0599
	53.135	55.7276			49.3993	49.3077
	51.3929	50.4			50.0921	53.2601
	47.0149	49.2886			49.2663	48.9778
	53.2622	50.8198			51.3071	51.5513
	45.6927	46.5172			44.6639	44.7612
	44.9216	48.1975			49.8559	49.6596
	45.0113	46.1519			44.7525	45.5442
	55.0484	52.6027			46.9923	48.2142
	56.0373	56.7254			51.5591	51.0851
	48.6976	48.9437			45.3656	43.6994
	47.908	48.136			43.6845	45.3641
	46.3779	46.5347			45.6002	48.4574
	43.1286	40.2911			53.4368	53.1952
	50.8505	51.8984			48.6388	48.9704
	52.1239	51.7791			46.7614	46.4465
	53.392	56.0799			52.7222	52.8435
	47.4661	47.0271			51.8848	51.7222
	46.8768	50.5287			47.3519	48.9059
	54.282	53.6899			51.8299	50.8467
	58.5933	56.3892			47.2324	48.0028
	57.4858	56.4545			59.2577	55.6257
	43.8572	43.9351			52.4927	53.8792
	61.9042	59.7627			50.2764	46.8874
	50.7122	52.3567			51.5363	51.4062
	44.1306	47.1671			50.2021	48.605
	58.8313	73.4558			52.2319	49.8378
	49.0704	49.9764			44.4802	45.6632
	50.1209	52.5877			47.334	48.0305
	50.5145	51.9155			51.2041	50.834
	52.0803	55.4886			50.5892	49.425
	44.4343	46.5133			46.6939	44.7504
	48.1536	48.7401			49.3617	50.5098
	45.6159	49.1004			51.2781	53.242
	28.2561	28.9842			47.9454	48.676
	47.0426	48.9484			49.3252	50.0481
	47.5168	48.7528			48.0881	49.9922
	39.3144	43.4697			49.5977	52.0136
	45.8234	47.3778			43.9012	44.7832
	54.4904	53.972			58.433	56.3664
	43.0352	43.0606			47.5572	49.1982
	49.0537	47.6519			41.503	45.6811
	47.8849	51.5578			51.8353	52.3621
	50.9145	50.1967			54.4662	49.307
	45.3985	47.5557			48.2569	48.366
	49.1306	53.1006			42.7546	44.56
	48.6338	51.7232			51.6988	52.2388
	49.7441	54.1909			49.4629	49.1047
	46.624	48.4506			48.4787	49.4296
	55.005	51.25			47.332	47.583
	48.2305	49.1273			53.8806	54.2997
	49.1256	50.6642			56.401	53.6515
	47.5316	48.8331			57.647	56.6103
	48.3676	51.9964			45.8976	48.8501
	49.9783	51.7834			46.8561	50.0744
	50.6401	47.2707			53.6819	52.4578
	48.5881	52.0442			49.7284	48.9948
	51.7061	52.0899			44.8293	45.784
	51.3981	48.054			55.4975	52.9509
	47.9262	45.9712			49.5877	48.6593
	51.3552	53.4422			48.9078	49.7682
	51.6904	50.7951			46.1433	47.7751
	47.8977	48.8892			49.334	50.3641
	45.7743	50.2818			50.454	50.5402
	55.6853	56.8175			49.1656	51.6766
	45.9462	48.1251			49.1553	48.1431
	54.3698	53.3132			45.291	47.596
	58.0245	54.9217			44.7848	46.541
	62.1146	57.7773			56.236	52.8111
	55.9526	55.4646			44.9807	44.8908
	43.5606	42.4643			47.35	48.3464
	41.7078	43.4493			46.7188	46.242
	56.9806	58.4464			52.8605	50.0074
	52.3429	50.483			53.3631	52.8031
	54.3112	51.6818			46.73	47.4632
	50.4729	48.5219			44.7401	46.7706
	51.6339	52.3461			46.7439	48.8438
	57.0241	54.7371			45.7358	44.225
	54.9007	53.4936			44.1672	44.1495
	51.7949	50.9488			49.1578	50.1119
	51.7564	53.6646			48.1477	48.8971
	49.9272	49.9099		Experiment #3	49.6802	50.9074
	46.5943	50.7273			43.868	44.9363
	57.4213	57.3923			40.846	39.8629
	52.1553	54.3994			49.6347	47.8315
	50.3216	49.6134			44.2815	46.2037
	48.7869	48.7995			47.5164	48.1437
	51.3641	51.2863			41.9131	48.1186
	51.6466	53.8718			47.8845	47.0731
	53.4533	57.619			55.1928	51.7445
	46.2552	48.472			50.5254	52.4148
	49.3025	49.0691			52.727	48.0705
	45.9136	46.959			48.9636	50.1734
	49.7181	53.6279			49.16	50.2463
	51.3305	50.4444			45.9143	45.1992
	53.227	53.026			52.6227	52.3956
	53.5358	53.2655			44.9865	48.1168
	48.357	48.6259			50.4557	50.5668
	46.1987	48.7637			50.3067	54.5625
	56.1303	58.8944
	39.935	45.4852
	50.0079	53.2581
	50.3742	52.0723
	50.9589	53.4074
	46.277	47.2177
	50.6704	49.5729
	47.9618	45.2382
	49.5612	49.1176
	57.3957	53.7526
	52.461	51.6427
	49.4298	47.6891
	54.2288	51.7027
	46.0801	48.9414
	46.5596	44.5247
	49.1826	53.1085
	50.9211	50.5916
	47.5087	49.877
	57.7186	55.6051
	43.2912	46.5848
	55.3264	55.0077
	46.7978	49.1476
	47.7052	50.4342
	43.5363	40.8347
	46.8819	48.7838
	46.5363	50.0917
	50.5259	53.0192
	53.1249	55.7964
	52.5359	52.3589
	49.1298	51.1995
	51.7598	53.3027
	44.856	48.5589
	47.6341	50.227
	49.349	50.6673
	40.7525	45.6544
	46.2349	46.0628
	45.1231	48.2517
	51.9813	51.9104
	52.394	54.085
	52.5869	53.5272
	46.9298	48.2857
	48.7707	52.5281
	52.2093	54.0434
	41.0559	47.0319
	48.4771	49.5847
	53.6176	53.5644
	57.6075	54.7707
	53.0338	52.3528
	43.3961	45.8765
	49.7175	50.9248
	44.4367	55.1749
	50.5421	45.3204
	54.4199	51.7337
	57.9546	53.1597
	51.5637	57.456
	49.9136	52.1701
	57.6348	50.0569
	61.1961	53.3451
	56.0623	56.0977
	46.9508	55.4043
	51.7949	49.626
	56.0043	50.9488
	48.2066	55.73
	57.2128	49.3575
	48.1148	57.6875
	46.0403	50.4603
	49.3025	47.8038
	49.6579	49.0691
	34.9859	50.8972
	49.2825	38.599
	47.0407	52.3443
	51.2978	47.4346
	48.1945	53.291
	51.0413	47.492
	51.0373	49.6563
	54.3165	50.2264
	46.8977	54.1741
	50.7188	50.0286
	41.7036	52.8772
	51.3164	45.088
	46.594	53.9896
	49.5059	47.628
	46.3142	50.3726
	40.1555	49.6955
	49.6631	47.8727
	41.9612	53.2786
	49.2756	42.2264
	54.1143	48.4849
	46.9132	53.437
	54.5678	47.7779
	51.3003	52.9258
	50.9566	49.0704
	46.7501	52.525
