# Supplementary material for: Stochastic asymmetric repartition of lytic machinery in dividing CD8+ T cells generates heterogeneous killing behavior
Source: eLife. 2021 Jan 11;10:e62691. doi: 10.7554/eLife.62691 (PMC7867409; doi:10.7554/eLife.62691)
Supplement: Figure 4—source data 1. [file elife-62691-fig4-data1.xlsx]

## Sheet: Figure 4
CD107a distribution between daughter cells after polarized and non-polarized stimulations.
	Polarized Stimulation				Unpolarized Stimulation
	all divisions divisions				all divisions divisions
	Distribution between daughter cells				Distribution between daughter cells
	CD107a	CTV			CD107a	CTV
Experiment#1	52.3865	50.2629		Experiment#1	48.9899	44.1326
	50.5587	56.4426			22.9694	27.8975
	57.3114	54.6436			44.89	61.087
	51.7783	46.7144			43.2795	45.1614
	40.2517	46.9744			56.9489	57.418
	40.1609	34.6418			44.24	46.995
	44.6242	47.5698			42.1437	41.7596
	49.7202	49.8321			48.6773	52.5785
	52.9886	55.8298			52.7846	50.1814
	55.2741	52.383			54.3556	54.8837
	61.7452	57.1006			49.0839	43.289
	51.8153	48.6276			59.482	57.9738
	48.2285	52.8137			48.2326	44.4711
	52.7284	49.4169			55.3368	55.3031
	64.4352	50.7252			48.4809	49.8486
	46.56	48.487			49.1841	49.3846
	51.8478	50.3098			46.6582	51.5781
	58.4627	53.1638			73.3766	61.7426
	54.9197	58.4592			39.9942	48.3792
	25.5218	39.5183			49.8547	51.7002
	46.1429	53.3958			34.8466	44.1535
	41.387	52.1346			59.868	56.557
	50.6298	50.4369			50.6854	55.9405
	54.6155	53.6854			47.5251	54.7743
	47.274	48.511			45.2283	52.3743
	56.3985	51.0254			60.2577	52.7065
	56.189	58.0121			48.2598	44.8152
	53.1007	51.2279			43.346	51.3546
	48.7347	50.8955			41.4148	44.6388
	56.7671	46.722			49.7298	56.1695
	41.3256	51.1313			35.6611	42.3413
	57.5296	53.8378			56.5939	41.8565
	53.2302	52.9982			50.2806	50.3483
	49.6827	52.3519			54.1596	46.8773
	53.2422	50.6203			60.0153	58.1371
	48.929	33.6602			42.0924	40.7529
	42.3103	45.3412			45.1378	48.1161
	50.4332	47.3831			43.1564	49.4351
	55.1075	49.1682			57.3568	58.373
	57.9661	48.5392			65.3675	66.3818
	51.9663	53.1118			64.5335	49.0592
	48.7383	47.5204			56.6271	53.3557
	58.0413	51.2437			48.2481	46.197
	39.108	45.1235			54.6682	51.9438
	46.9104	51.8066			56.5949	53.6992
	61.0773	50.7416			51.0417	52.4999
	39.3616	49.9723			55.9238	47.7631
	54.7797	53.3122			55.474	51.3248
	44.562	52.7035			55.8893	48.5177
	56.9457	53.7917			33.635	53.0767
	50.1986	49.6472			39.8054	43.9719
	51.7934	51.2595			53.8607	51.9267
	53.8501	50.6662			35.0152	44.199
	54.8575	54.8787			60.9864	55.5303
	59.3728	46.8475			37.5344	35.1281
	46.9075	51.7506			50.329	49.969
	41.5336	40.8544			54.8792	50.701
	49.1454	52.2991			38.1285	42.7492
	56.5637	49.407			60.3304	59.7056
	56.3419	51.013			46.6342	47.5733
	51.2439	42.2731			43.5429	44.8655
	49.6067	45.6066			57.778	58.3431
	47.8061	52.0652			58.8807	53.1187
	60.6497	50.5855			48.9138	46.4851
	54.1208	54.1232			49.6033	48.5857
	57.1058	55.6658			52.1492	38.3398
	57.7317	53.9488			40.4696	41.5933
	50.9192	49.6264			59.5828	62.5777
	49.2429	47.9464			30.7384	37.9721
	54.4164	49.4383			44.5971	46.1126
	41.6087	49.3826			36.4273	45.5276
	51.2132	49.4821			71.1029	61.7517
	46.8587	44.8432			36.3065	42.5553
	45.6162	52.4009			29.9298	51.9539
	41.4855	50.487			45.6086	51.0711
	54.6841	50.6889			44.0088	45.0613
	43.066	50.085			43.8533	50.1424
	45.2816	48.9396			52.1358	50.3796
	50.0924	60.1528			46.5816	49.2529
	46.1768	49.6073			43.4473	48.2451
	54.4659	49.5386			56.0984	49.067
	40.2202	48.5034			49.3202	55.8482
	42.145	48.0651			34.8008	55.4573
	39.6368	46.4349			49.2432	48.1154
	57.8576	52.3336			50.3563	51.959
	49.9928	50.4094			53.8973	46.4982
	61.4733	54.7272			61.3925	47.9336
	55.941	52.5823			46.3943	49.496
	53.3648	49.0545			39.8956	50.6481
	44.2376	44.2551			45.9407	49.7379
	52.0136	49.4579			56.3606	54.7978
	50.3173	48.2931			56.3119	57.1547
	48.5707	42.3318			41.9359	49.2506
	57.3158	53.7883			35.0264	47.8059
	60.7438	47.4599			51.4706	55.0695
	45.3475	50.2488			53.9899	45.8669
	48.8181	50.9791			45.6346	46.4676
	49.4204	48.3941			45.0311	42.9134
	47.6992	50.1379			43.9859	45.3592
	58.5598	50.063			37.2243	49.5518
	52.0006	52.3135			54.6769	52.1143
	52.1007	50.4678			60.2643	52.5563
	53.4824	49.9776			27.315	51.8455
	57.3916	46.2688			52.6045	48.2358
	42.4226	47.3304			61.877	50.6966
	45.498	44.8577			58.0169	50.625
	68.2059	53.0836			59.0252	58.4091
	50.4446	50.7534			53.824	47.8404
	52.9936	45.9445			36.2044	45.8444
	53.5845	49.6329			57.9264	50.9605
	56.3359	50.4946			48.5104	47.2312
	55.4392	47.4549			51.0655	52.5855
	58.8107	50.7998			44.7501	52.4222
	46.4991	50.5793			37.2743	46.2253
	45.4897	50.6295			58.3276	52.9889
	52.3603	54.727			44.3939	54.26
	42.1031	41.7612			37.2981	40.2375
	51.0163	52.9348			38.1675	46.5082
	39.7871	46.2169			46.8907	47.5036
	39.6453	48.9237			51.1929	53.9857
	42.9336	49.5382			55.6427	51.2897
	49.7182	47.2153			49.5159	47.6184
	57.6404	51.9849			69.9986	49.2818
	47.7736	52.6341			44.7834	45.9592
	50.8568	52.0636			47.823	50.5596
	47.3297	46.7428			41.6163	46.9681
	59.9448	54.6615			50.6004	50.9224
	44.8496	49.0384			45.7705	46.2616
	57.4252	52.2319			47.5965	41.578
	59.7645	55.6941			41.763	48.4703
	56.0519	52.7278			44.8987	45.1855
	59.4835	54.0065			40.398	40.7237
	54.002	52.3701			44.1766	43.9418
	56.8694	45.5237			51.6512	45.184
	63.0324	55.0409			35.8901	29.9386
	45.4425	46.7008			44.6892	51.6824
	41.6518	44.5917			62.5403	54.733
	60.7608	51.6351			60.617	59.6084
	47.3768	50.2879			61.2719	49.2716
	50.1526	50.8145			60.2071	54.9838
	53.5701	53.2013			56.2762	52.5751
	37.0541	51.7603			43.4003	43.5402
	52.9634	54.2697			38.3816	42.8603
	54.6624	52.0829			56.2348	52.3866
	54.5524	45.1205			59.8066	50.7338
	59.3661	52.9745			40.1927	47.1958
	55.4999	53.6935			47.457	46.2412
	52.4822	57.0418			72.9845	53.6161
	63.3538	53.4577			48.6987	46.683
	52.1008	53.1969			55.4363	49.5665
	53.2376	52.4016			66.4084	64.2792
	36.3285	47.6499			47.0274	50.7604
	47.2276	49.9034			60.4808	57.6255
	46.2716	53.6375			37.1662	41.7794
	48.1765	51.6387			56.3159	49.376
	50.5128	48.5179			46.5894	46.8366
	49.5273	42.8739			58.9546	54.7134
	61.4372	48.5801			50.7035	54.9696
	46.8862	48.8032			36.3377	50.6831
	41.2311	46.0892			53.6832	46.0106
	58.1345	52.4905			39.5441	48.362
	57.7262	55.4538			50.4415	45.4307
	65.1041	55.6453			64.7598	52.7587
	42.54	55.1472			35.6101	44.4465
	51.6447	52.7051			43.7664	45.5087
	33.2497	51.3865			51.0865	51.3432
	45.5184	51.7375			48.5259	51.0996
	51.8021	50.4157			55.5493	55.6449
	54.2846	46.4881			51.129	45.9012
	51.8689	51.176			56.4043	46.3603
	48.2105	45.8915			32.9716	46.6083
	51.068	57.1306			49.2742	47.8508
	45.712	54.196			51.0264	56.9106
	49.5517	44.533			43.3257	48.8295
	56.2373	56.1175			47.5295	47.7346
	47.7156	49.7648			44.2024	51.1335
	43.4032	51.8746			50.4055	52.8478
	47.4049	49.289			42.5371	45.8937
	53.5404	49.2643			41.0123	44.7959
	52.4302	56.3139			36.9291	40.141
	60.5099	56.9339			65.5549	56.2805
	50.2536	53.0938			63.3526	55.3557
	40.1559	49.7719			59.1906	58.1009
	51.0242	51.5847			58.7563	57.024
	42.5243	50.6977			61.4205	56.4953
	45.6794	51.1668			58.3176	48.9091
	37.1953	40.7753			50.4201	53.3845
	38.9553	46.5969			54.8498	47.622
	48.1342	48.7323			50.0457	50.425
	52.7442	43.937			48.3106	44.6829
	48.4337	46.7666			43.3555	50.8631
	57.2103	52.5359			53.0217	57.3856
	44.5264	49.1424			54.8643	58.7015
	55.5675	52.3909			47.7684	49.3225
	55.3027	52.8245			44.4796	45.2921
	64.7858	55.7422			56.5426	48.236
	47.3383	48.7154			52.3017	47.5218
	54.6863	49.9849			45.3435	54.5884
	52.5936	50.8182			63.8422	58.8566
	38.7041	48.9084			43.4972	48.5596
	54.5498	55.7415			47.2497	51.4568
	70.225	53.1219			60.0092	47.8925
	64.476	48.9395			40.386	50.3797
	47.041	46.6579			63.1352	55.88
	51.6018	51.4448			59.3123	53.0217
Experiment#2	54.888	50.2499			46.2301	49.7267
	39.8837	50.0077			53.2304	54.8122
	46.5647	53.3113			53.358	51.7258
	58.0907	56.3195			62.3066	56.1556
	56.2163	53.2733			46.0334	50.6239
	54.2536	54.1761			44.8332	47.9371
	34.6959	42.7157			51.2524	50.474
	29.673	16.8639			49.3638	51.5797
	42.5926	49.2663			53.6112	57.9767
	45.8469	50.2596			51.9924	48.0191
	59.9	51.0624			34.6789	36.3253
	46.6748	47.2491			51.9527	51.1306
	48.4856	48.3484			40.8971	42.7122
	64.6803	49.197			51.0811	52.8363
	67.1749	46.5892			39.1642	48.3592
	40.9854	50.2508			52.5926	58.7896
	44.2963	48.0207			61.9349	55.8279
	43.6912	45.3639			50.2704	51.7674
	51.769	51.5057			37.7203	43.5069
	46.8986	48.4512			55.5919	52.0681
	56.5769	54.4357			51.2818	45.3984
	44.4468	49.5906			45.5109	51.6581
	51.5096	56.1345			45.1444	43.4215
	45.5924	46.5759			40.8304	43.999
	48.9939	47.7062			50.5457	48.8947
	50.3794	50.6958			47.2073	50.0995
	46.147	50.4662			55.1006	49.8146
	54.9216	50.3177			49.2336	54.376
	54.2212	57.4575			64.679	54.211
	43.9726	53.9423			60.2665	57.8232
	56.1485	53.4106			46.1945	50.181
	48.4458	45.9843			40.792	49.6133
	38.9353	47.9782			60.5471	52.8956
	43.2754	51.1031			48.6209	47.1565
	50.973	48.6977			45.6148	49.95
	42.9607	42.6385			53.6984	54.3512
	46.4472	48.0759			56.012	54.936
	58.2378	51.1429			49.9539	49.8363
	51.5085	51.5309		Experiment#2	41.3079	52.8321
	54.803	52.8447			41.7666	47.4963
	56.9446	53.0222			53.5503	49.9277
	44.0771	51.1933			50.8576	55.5572
	44.4013	49.6278			48.2839	46.5838
	54.8376	56.1913			41.7031	40.5098
	63.5526	56.698			72.7336	56.8613
	39.5658	47.5056			44.1573	42.9293
	52.4964	51.9474
	56.1447	50.6478			45.7536	47.0031
	46.0523	44.4881			56.5691	58.0354
	48.3159	48.6442			54.9708	50.8735
	48.881	51.7996			46.6636	46.8353
	41.9724	44.0683			43.093	45.0863
	54.2266	55.2636			54.1525	62.9486
	50.1489	50.5759			51.779	51.6268
	51.6387	49.3828			58.2283	54.1993
	49.8528	52.2051			59.3332	49.9014
	58.6848	51.1794			44.0347	50.7745
	57.7809	55.2966			55.849	51.0508
	40.16	52.9175			61.0471	59.2924
	49.0913	53.4566			40.9878	47.6244
	49.2973	49.563			41.6133	46.2153
	57.8463	56.3051			48.9835	48.9641
	33.8378	43.7605			49.8806	50.7064
	41.3342	44.0459			36.4977	45.5975
	40.9384	49.173			47.9632	45.3189
	52.3525	51.6633			48.2835	51.2972
	45.7626	47.895			36.0069	51.2
	58.338	58.9599			57.4847	44.1207
	55.5941	52.2018			44.5816	45.81
	46.9751	40.7885			44.853	53.7593
	43.9791	47.3598			44.1387	52.5486
	48.9782	46.2182			53.5521	47.1089
	53.3602	52.0637			61.1665	55.3318
	50.6509	43.2735			47.454	48.7455
	50.1949	50.0472			55.4927	56.8083
	66.3653	50.0277			44.2114	42.5026
	35.8503	48.6607			43.7448	50.8959
	56.0326	55.1645			48.3998	48.7943
	43.7838	47.8045			56.8113	51.0175
	48.1975	53.6692			57.1	53.8757
	44.2122	50.945			58.8913	56.2686
	44.4746	51.7544			31.4528	46.879
	48.3212	48.8818			64.2035	52.6732
	40.4358	48.4962			58.646	50.3559
	44.7918	42.9538			58.8612	48.4955
	47.2723	45.2008			52.6563	48.8994
	53.1391	51.0493			54.5091	45.9267
	56.9246	52.4827			57.8899	55.3508
	42.0679	43.4385			56.922	53.7472
	43.2677	53.1577			46.169	55.2355
	53.5418	53.0808			46.2588	50.5479
	45.8195	51.7231			42.66	40.5951
	43.3798	48.6868			43.0153	47.2118
	55.6404	48.3545			43.9049	42.2527
	42.4769	47.3907			49.6611	49.5897
	39.477	48.5371			33.4367	45.2303
	64.919	52.313			42.4678	51.895
	33.2547	45.4992			47.8448	54.576
	66.556	57.1937			55.4254	52.0557
	49.3712	49.0149			51.1103	54.752
	46.505	47.5313			40.9519	40.5534
	45.5718	47.8834			52.9937	48.7205
	52.8896	51.6103			52.6257	57.613
	49.2035	50.4727			47.8153	52.9255
	48.1142	52.9464			46.6898	47.7222
	55.5757	51.4377			43.8548	41.5033
	51.0417	52.0679			54.978	54.1585
	63.1603	52.5043			57.0119	50.3202
	54.7328	54.9804			52.2803	47.7243
	45.4798	46.7544			72.2445	68.7268
	38.7842	44.1867			52.9397	50.5267
	56.6512	50.5983			43.3857	52.7576
	56.7303	53.2242			51.6157	50.898
	47.5117	50.3205			42.0755	42.0403
	63.3116	49.848			35.8637	45.8889
	60.1699	67.0866			62.8481	49.3961
	54.8152	49.2636			21.9018	41.857
	41.1474	49.8902			45.3899	42.9363
	42.0874	48.683			45.7481	46.0308
	36.2437	46.7115			43.9688	49.0615
	49.846	49.5133			34.9962	41.1614
	44.2582	49.7672			45.4851	51.3794
	48.2206	49.672			59.396	48.0335
	68.0922	51.6302			44.8072	49.7013
	59.4949	51.843			55.2265	43.0714
	60.3298	52.3231			47.4923	49.6517
	43.8134	51.1813			55.1516	46.4726
	47.337	53.2955			53.4017	51.3298
	59.0719	42.3945			51.562	48.5354
	57.9424	51.0084			41.4802	42.8248
	51.8679	51.9903			38.0314	46.9934
	58.2071	53.4607			51.3443	45.1743
	59.4749	50.8145			75.0501	60.1363
	50.3593	51.3947			37.477	42.4785
	49.8002	48.1358			44.8119	51.2849
	45.8814	46.7489			34.8083	41.2096
	41.9602	47.9519			62.8279	57.3709
	45.201	50.6306			37.9214	43.7025
	41.8952	47.153			35.7148	45.0118
	61.4756	47.4421			53.5633	49.5345
	44.6079	53.2558			49.6225	50.2652
	50.2844	51.3693			41.9099	45.0416
	57.7615	51.0775			39.8284	50.0182
	53.7542	52.786			55.6749	54.3345
	63.2749	52.3685			43.9622	46.2724
	49.3122	50.56			45.2177	45.4533
	46.9587	48.7702			53.6578	53.242
	61.0793	51.0429			47.6735	51.1001
	53.1835	53.2758			50.229	46.3587
	50.6295	52.3764			32.9218	44.4596
	43.4531	49.162			54.9933	49.2661
	35.6409	48.7941			52.6624	47.5374
	52.0557	47.0257			52.0717	50.3721
	66.9808	51.2467			42.9597	44.907
	49.6139	49.4676			55.4697	52.0992
	47.325	46.5512			38.8951	45.7122
	61.6612	52.6119			73.2291	49.7391
	47.2754	43.3551			45.4916	46.1067
	54.5006	44.4732			41.4962	46.3071
	38.8505	46.743			45.1211	42.4243
	48.3913	48.1037			50.3813	50.2264
	47.2772	51.7363			48.776	49.1178
	54.2491	58.2337			48.8979	50.8618
	53.6515	53.4856			55.0881	55.0247
	42.6427	44.0524			49.0854	50.971
	33.5247	48.9233			51.5967	48.139
	45.5686	44.1831			60.9512	52.7496
	48.9427	50.3546			58.7034	54.9044
	53.2538	49.6236			46.041	48.0834
	43.7821	47.4922			50.6493	47.4609
	56.987	51.3329			61.285	53.2909
	44.0848	43.4584			57.828	54.1342
	54.2572	48.9737			33.8055	50.3958
	46.0664	47.9472			42.6243	47.7126
	50.187	52.1352			41.936	43.7702
	58.1657	50.1151			64.8327	57.2372
	37.5229	50.3487			49.4429	48.4509
	53.6224	54.6964			48.9583	51.0615
	56.816	51.8925			45.7898	54.4069
	44.2276	46.3165			45.4339	53.3036
	52.9096	51.1317			57.2013	53.8796
	53.486	43.9641			48.8888	49.6694
	68.0638	62.7994			49.0162	48.1048
	40.4842	45.1108			53.9452	54.5944
	37.4793	49.2023			43.5774	50.9386
	47.6431	52.5782			49.3189	49.1056
	36.2628	48.1611			46.8955	47.7218
	53.8228	59.5015			48.5309	50.1524
	65.1182	55.8318			66.1661	59.9177
	52.1819	49.3425			41.4914	19.3019
	42.7122	50.3025		Experiment#3	47.1609	49.5713
	54.4562	48.3882			51.8888	48.0205
	55.4139	51.2242			40.0485	47.9259
	60.7503	45.8299			46.4818	46.6675
	58.0426	46.2955			49.5792	47.8085
	39.3835	48.2974			34.9993	45.7168
	51.9959	47.9575			48.0261	45.92
	45.5927	36.6753			55.0347	54.7687
	51.4244	51.7774			55.3835	65.158
	46.1479	52.9738			50.8472	49.638
	45.9615	46.5597			50.3501	49.973
	55.5874	47.3601			55.1821	57.3401
	63.2338	54.9163			43.0914	52.1545
	47.2106	47.6458			52.4432	49.6448
	53.4651	47.1082			56.8354	51.9504
	52.001	50.0753			49.2801	52.1151
	52.0733	49.7529			66.4758	55.0923
	49.6247	43.3427			64.6717	49.1259
	53.3665	50.8812			56.3462	49.7675
	48.3231	53.7916			48.802	46.3241
	63.0517	54.3842			50.1948	53.7804
	50.7372	56.1403			48.7434	52.2552
	47.4244	47.6878			55.2437	47.1054
	38.8799	47.9476			46.3881	51.3657
	44.1251	48.3398			55.654	54.6387
	44.796	50.4608			46.3204	48.7437
	46.8939	45.3026			51.203	53.1294
	49.5993	55.2525			37.4595	42.1223
	33.9751	49.2328			51.0916	45.0505
	47.2187	48.8505			58.437	54.7561
	55.6716	51.6557			64.2175	56.407
	40.8282	46.8119			49.8864	51.7123
	50.7693	52.914			49.6618	42.5249
	51.7058	49.7799
	49.355	54.993			54.5413	51.1145
	57.608	48.932			56.2556	54.6531
	44.7253	51.3995			48.5326	47.3031
	69.0517	59.8348			42.9863	43.0068
	55.719	46.9633			47.0465	51.8745
	51.8777	53.3471			53.1232	46.9057
	50.1555	51.529			47.6377	47.4761
	57.5249	53.1499			42.972	54.8761
	44.6276	54.9918			46.4834	49.6221
	47.5281	48.4873			53.9206	56.3766
	59.6167	50.7314			54.8394	51.8225
	55.7149	51.2564			56.4199	52.6981
	44.5323	49.4338			49.9208	49.2921
	45.5649	51.801			51.5929	55.1995
	61.4081	60.6521			52.0318	53.9301
	58.6034	50.1731			43.1543	42.8604
	49.2252	45.7182			48.6359	46.9809
	48.7426	52.54			46.032	56.3699
	45.4463	53.2713			43.8118	49.3595
	63.8839	61.5967			55.4382	54.6093
	64.2398	55.6555			52.9539	48.4909
	53.096	55.3515			36.9165	41.2861
	52.5129	50.9214			42.6675	58.568
	45.9279	49.6329			46.5386	56.123
	54.2669	52.2997			41.3187	45.6006
	49.0129	49.8871			52.4539	47.6503
	58.4187	50.2627			50.7363	52.1902
	40.7774	51.2655			43.5008	48.7106
	42.3052	47.8816			44.0347	45.9196
	47.5272	54.5875			54.6778	49.3603
	46.5294	51.8543			49.4463	45.802
	44.2241	45.4118			58.3003	54.7369
	51.7287	49.2669			56.2075	51.2373
	34.8957	47.952			46.643	45.83
	48.4191	49.7949			68.1953	56.7662
	61.3781	56.5078			49.4247	54.0433
	37.7592	41.2004			49.8357	53.5222
	56.53	54.4126			48.5269	52.3478
	51.3579	59.3063			58.3632	52.8769
	38.4301	42.1652			40.7717	47.5748
	52.5561	53.5513			58.4158	53.2688
	42.5008	43.4571			48.8443	47.8691
	39.4422	56.314			56.6144	57.8884
	46.5169	44.9195			64.7802	52.3663
	44.3353	51.6633			52.9416	43.8136
	52.5326	52.4274			51.6481	51.1008
	43.9019	49.6782			51.2048	49.0267
	51.5168	56.0604			46.4197	46.6103
	38.6722	42.6272			49.7812	47.4934
	48.9084	50.6781			32.5378	45.8745
	55.6817	54.406			49.3613	47.481
	53.9425	56.0718			47.6061	47.2062
	40.7001	48.5268			48.1844	51.139
	57.3224	50.7026			53.7028	52.105
	39.8933	51.2225			48.8363	51.8012
	49.2287	54.3837			48.1983	46.4108
	39.5701	51.2154			38.5716	37.099
	56.2736	54.9751			57.0935	49.201
	50.6053	50.6842			55.3954	46.8252
	47.0951	51.5034			45.5534	48.0263
	36.6891	44.845
	27.3931	46.88			44.8081	44.0745
	42.0992	46.0025			36.761	43.6282
	48.0169	48.9397			62.9859	57.4846
	49.3355	49.7138			47.7531	47.7916
	49.6864	49.3095			51.8897	50.3786
	42.3043	51.723			56.2557	54.4033
	56.0789	53.3465			50.1457	43.2762
	56.7161	53.1754			43.3908	48.6202
	48.8406	51.1819			53.3712	56.3707
	44.6855	52.658			44.6607	49.1714
	47.0845	48.9565			52.5078	51.1117
	44.3276	53.2725			50.8829	50.5553
	60.9505	48.2973			41.2808	47.0772
	39.0162	45.0244			54.4327	53.4787
	60.7982	51.0594			50.0939	51.654
	46.5119	46.8494			44.2023	45.2324
	40.9874	43.9069			49.3325	47.7756
	46.7097	50.8527			42.1657	49.6624
	47.7177	47.2769			57.8864	54.8525
	52.4901	54.6779			42.9657	50.799
	38.8284	49.0886			56.45	45.4732
	52.4019	51.602			50.9493	50.939
	57.2633	53.0722			29.5904	46.2853
	46.8418	52.8926			42.4566	47.5707
	49.3075	49.4991			45.1623	47.47
	51.7681	49.0951			52.6571	48.1455
	39.8503	50.2916			64.9292	56.1059
	51.2083	49.7097			51.0735	47.6472
	44.2394	45.8651			52.0014	52.0175
	51.659	50.4766			52.1715	47.2253
	57.3205	53.828			49.077	52.7522
	56.0727	48.9624			52.2211	50.5188
	49.8873	43.2059			55.061	49.398
	51.2122	52.7142			57.7548	52.4308
	53.7371	50.383			53.0682	48.4024
	65.1147	51.9074			49.4063	53.4794
	41.0928	47.7645			44.5029	52.2623
	47.6348	51.6564			51.9372	50.9552
	44.7592	48.1409			61.5194	46.175
	56.5756	54.0219			47.9835	45.7413
	51.2042	52.0133			32.1517	53.5256
	48.9244	48.8526			51.7096	53.1076
	45.555	49.4424			54.3761	52.2915
	47.7741	56.391			56.4366	55.979
	51.2538	46.8475			46.6572	52.3509
	47.9602	50.8541			46.7657	53.2889
	55.5341	54.125			57.3226	52.7439
	45.6084	52.9048			45.3261	43.7488
	58.5049	58.9862			57.7999	51.5645
	37.9969	49.4417			35.6495	40.3297
	41.5097	47.1383			56.4333	53.3597
	39.71	48.7091			52.3649	51.6263
	43.3976	48.5654			53.0557	53.6823
	51.2298	51.2104			50.1977	52.1758
	33.1667	47.4629			55.8763	53.2615
	43.1842	49.7881			58.6628	49.8026
	53.6827	50.7413			42.5814	41.9618
	46.2137	49.462			50.9469	49.5493
	45.8364	46.3075			39.1262	42.125
	47.8806	43.8865			37.6366	46.3245
	43.5305	47.5067			52.357	48.7912
	47.3991	51.7488			41.9641	43.9752
	43.5269	46.8957			54.2352	53.1
	55.6472	55.9952			53.2016	47.2226
	50.012	52.2198			59.1548	56.4321
	61.1005	55.8054			44.2864	47.5389
	48.1035	49.8287			54.5677	47.0817
	53.7664	51.9261			38.9881	45.6495
	51.5087	49.2973			29.1873	53.9302
	42.5772	47.7588			71.3488	63.587
	44.7219	47.2006			50.2178	49.6691
	60.5499	50.9092			51.0175	52.367
	45.9592	48.2461			59.018	51.822
	51.3197	45.0908			42.7157	49.1766
	39.6107	49.0725			60.3447	56.9812
	50.6658	53.2997			48.2107	46.9114
	47.1134	47.6594			51.3017	58.6366
	48.095	50.6986			51.257	51.1003
	34.2444	47.1018			53.0871	48.5444
	52.8459	49.5411			61.7618	46.9826
	52.8897	50.4803			22.9015	45.0859
	54.5773	52.5367			34.9193	42.2623
	41.4826	49.0947			54.888	54.2011
	49.4792	47.8964			43.3687	57.3659
	52.6723	53.7612			51.6065	52.0634
	36.9928	49.3996			34.771	44.1604
	42.0462	44.2674			45.7575	49.2471
	45.2674	46.2519			48.1032	46.7974
	57.692	48.9566			50.3051	49.219
	47.6447	45.0269			50.0923	55.2021
	51.8278	53.2782			43.9186	45.8188
	46.2529	50.9594			53.6574	51.0824
	57.2341	54.5515			49.4488	50.8422
	58.606	45.7867			43.3808	44.5873
	43.2844	51.4099			55.9966	52.268
	53.0464	46.3086			55.4184	50.1965
	51.7122	53.5336			41.733	49.7852
	60.5432	59.4029			37.895	41.8096
	47.574	52.9012			54.8368	50.3853
	46.0132	49.0612			45.6975	47.652
	49.3292	45.0383			53.5409	49.8318
	49.8362	52.9267			61.3663	55.7204
	38.8182	43.5284			48.9049	51.6534
	55.7011	49.273			52.0386	51.0074
	52.9165	51.7014			51.6216	49.2045
	38.8112	43.193			56.3505	55.8743
	59.4333	52.1173			50.0877	49.9378
	48.8678	51.4006			43.622	46.3083
	46.6048	50.4536			56.6969	52.2687
	39.3977	48.8456			49.7539	49.4815
	46.7675	49.8167			60.6053	51.3757
	34.1852	42.4107			52.6317	51.2876
	34.1016	52.2871			53.5603	47.6018
	54.1304	54.0074			56.0068	51.7525
	49.0747	52.4428			55.8141	51.9325
	49.2209	53.0269			49.9728	50.6692
	50.4893	50.5115			56.1841	54.5799
	50.3826	50.7493			50.4648	49.0143
	37.7769	41.5625			58.413	55.6875
	44.6619	49.8718			60.5802	51.5689
	49.5596	58.1931			56.2353	55.5128
	54.2021	47.7294			53.2969	52.6956
	57.0297	54.3467			56.1574	50.8574
Experiment #3	56.055	49.4319			44.7032	48.6907
	70.4639	50.9759			47.6841	45.1824
	47.8106	51.9513			41.4121	49.9085
	57.2867	54.1204			47.0115	47.2588
	50.8877	53.201			63.0482	56.946
	47.1854	49.2486			49.5239	50.9435
	54.7864	52.839			54.2586	55.1598
	53.3333	48.6761			47.7007	52.5596
	45.7229	52.3013			48.3004	48.5606
	37.5785	49.7095			53.8069	53.5037
	55.2312	52.252			54.7475	55.3453
	48.1538	49.669			56.7872	52.9303
	52.9555	52.7698			50.5002	46.7384
	45.5568	48.5727			45.1893	51.4073
	44.4883	45.0606			52.7302	49.4431
	36.723	47.2165			45.3112	48.2056
	44.0574	52.3581			55.0499	55.3942
	50.1846	50.2191			44.831	46.1251
	48.1249	47.5616			47.4581	43.3868
	47.4081	51.7574			57.2411	51.8864
	69.828	51.0126			53.2505	47.9276
	49.9813	54.8415			50.3396	46.8435
	44.4018	52.6027			45.4637	45.1163
	53.0143	48.6331			35.0908	48.7021
	50.0292	47.7563			54.1435	52.307
	40.941	48.8562			42.6651	47.1095
	37.6863	42.7416			47.9517	44.9806
	60.8644	52.5694			50.8453	52.7055
	51.8625	48.0226			45.4339	45.8269
	53.0673	52.2264			52.2743	50.0547
	44.4394	46.6533			45.419	47.3859
	40.1679	48.5371
	46.0509	46.5465
	60.6964	51.6254
	51.3207	47.8407
	53.7156	52.0436
	54.5054	50.1246
	51.4414	53.4649
	53.8849	49.6157
	48.4967	49.7973
	60.8188	54.5872
	51.7272	43.7391
	36.0884	50.8507
	43.8005	42.4904
	55.4686	52.3605
	45.337	43.6575
	62.5082	52.6416
	59.7329	55.2234
	49.2042	49.4124
	44.7055	49.8603
	48.081	46.6775
	56.212	53.3603
	42.3763	49.0466
	57.8236	55.2932
	49.2724	55.8724
	43.9052	51.7052
	59.2268	51.8951
	44.0792	45.5128
	50.9972	52.5289
	35.1289	46.2527
	47.2722	47.6387
	42.6759	49.7349
	61.9794	54.1898
	45.6185	49.5861
	50.5399	51.2765
	41.3743	49.5313
	39.9136	47.4947
	54.4299	51.2021
	50.9978	48.4218
	54.0883	49.7156
	50.8975	50.8668
	44.4116	52.8654
	52.2963	52.4854
	47.4798	50.6085
	45.5522	48.891
	51.858	52.4283
	48.1337	50.9943
	58.8286	51.9718
	45.7421	50.4088
	55.7931	45.2236
	52.9636	50.6515
	53.2236	52.1096
	44.7915	53.4989
	51.6648	51.4743
	51.3545	52.9172
	60.1412	50.4437
	49.4678	52.0089
	52.1942	55.2892
	50.6537	50.1307
	47.6773	48.9879
	54.4918	51.365
	58.5649	55.962
	45.2505	47.6594
	43.4965	47.0247
	56.8235	51.4081
	55.8537	53.8513
	58.7136	52.4878
	54.4462	54.0758
	50.8221	49.551
	61.3117	52.084
	55.7219	52.5274
	62.4344	51.0756
	52.6544	47.4369
	48.229	47.7053
	47.3997	47.7995
	54.0365	49.8441
	48.241	51.7534
	53.842	52.9672
	49.849	46.5902
	47.3039	49.4271
	43.0712	53.2874
	49.9271	51.9207
	49.3423	51.6821
	61.238	51.6821
	61.9438	48.766
	41.8188	50.39
	54.0559	48.5209
	37.4763	47.3309
	63.5702	49.9824
	48.6617	48.3659
	49.4256	46.9496
	41.3274	48.8281
	45.2467	48.289
	49.1765	48.8008
	55.4026	51.5847
	56.3288	50.9625
	48.8516	51.3031
	77.6598	81.6103
	48.6309	47.8321
	49.7746	48.7629
	53.9936	51.7503
	57.5238	55.662
	32.1053	52.4704
	62.464	53.8798
	45.3433	52.3885
	43.397	43.6668
	54.3603	55.334
	42.7562	44.1891
	55.7779	49.6981
	55.1809	55.876
	52.9868	52.5358
	48.2751	47.766
	51.9794	49.5605
	48.5208	55.298
	51.2585	53.03
	47.4931	50.1843
	49.7022	75.657
	46.6662	47.1285
	53.6389	54.0822
	64.5531	54.1777
	52.9383	56.0165
	59.1024	56.6029
	53.4186	50.1381
	50.7415	52.5774
	43.7364	53.5369
	54.9295	50.1787
	55.5114	52.9509
	58.3028	52.4042
	46.867	49.5194
	51.2473	44.7067
	53.6301	51.9052
	23.7719	47.9961
	48.6716	48.3355
	49.3444	51.5129
	50.4003	51.7809
	51.9365	52.1287
	51.8294	56.0398
	48.1496	52.1336
	51.7205	50.0738
	51.7173	53.9011
	53.8644	54.361
	58.3085	56.3381
	53.4979	52.3112
	48.6849	57.0542
	40.2346	53.9762
	49.1812	48.1107
	47.9485	51.6705
	52.6162	48.03
	42.913	45.5527
	56.2938	55.3888
	56.8584	50.1352
	42.3995	45.9355
	50.1857	52.3561
	53.3618	50.3896
	55.9969	52.0226
	50.8536	48.094
	42.2434	43.1365
	46.175	50.9042
	46.9453	48.7668
	52.9541	51.5393
	53.5654	51.8256
	45.1258	48.1363
	42.9141	49.0666
	49.1344	54.5546
	59.7598	48.6191
	43.8665	44.5008
	48.8524	46.6031
	56.9634	54.5993
	43.7728	50.3098
	46.6086	49.855
	47.9071	45.1816
	40.6948	49.1972
	40.941	48.8562
	51.6453	52.0616
	57.5735	51.558
	53.5078	54.6612
	39.0818	50.0438
	46.0547	46.7243
	49.3803	49.3823
	67.8443	56.3785
	58.6698	46.6979
	60.5556	54.259
	52.3856	49.0276
	49.4419	52.2787
	50.3719	51.2143
	40.2219	48.8778
	49.3546	52.6582
	44.4431	45.6579
	49.6447	50.6693
	49.6802	47.8129
	67.6062	50.3697
	44.2165	45.6082
	46.2607	45.5947
	43.3217	52.681
	43.6538	50.4063
	49.6425	50.5183
	41.7671	48.9821
	52.6234	54.7319
	61.2776	50.9217
	48.2418	51.1158
	48.5641	49.3859
	47.554	52.9922
	55.0698	54.5122
	44.8266	51.3474
	43.4194	52.5673
	53.6846	51.9413
	58.7319	53.2677
	50.6384	50.1517
	39.2778	47.1082
	52.2311	54.3533
	62.3981	55.351
	59.305	49.7679
	49.0089	52.2003
	50.6728	51.1484
	47.1745	52.2217
	44.705	49.404
	48.4967	49.7973
	50.6154	47.8247
	57.2477	54.8726
	43.8005	42.4904
	46.1157	51.6179
	58.5637	49.9341
	54.8659	48.3925
	54.8224	56.056
	58.4318	56.8383
	53.9529	52.0934
	44.2951	53.4831
	50.6257	49.062
	48.1788	51.3768
	51.3398	50.9849
	57.3218	55.1307
	56.0942	52.3657
	59.397	52.8097
	51.2118	48.7441
	57.407	54.9001
	54.4102	47.5032
	51.5324	50.9585
	47.6696	50.0319
	52.9243	52.6905
	55.3576	56.4461
	57.2907	51.8234
	46.0747	48.8835
	60.4525	53.6138
	59.7421	54.8259
	47.6305	45.1388
	46.0153	48.3282
	52.7837	50.8802
	40.0793	48.4196
	48.8389	48.4828
	50.4323	52.4661
	46.9023	51.8757
	53.7392	51.6429
	56.0051	53.7321
	48.9165	58.338
	52.0618	54.2214
	39.93	51.4278
	55.6334	51.454
	36.6739	37.0904
	47.7776	48.6525
	54.0863	51.8229
	53.8266	52.7473
	47.3641	52.4645
	51.08	49.2502
	40.6916	44.9174
	53.6382	48.716
	61.1314	50.0203
	54.7483	52.2626
	52.9606	47.4186
	49.7468	48.1827
	42.6029	43.8083
	51.7263	53.023
	64.6265	57.6714
	62.0897	50.8643
	50.6563	49.5192
	63.1006	51.0726
	51.3403	52.898
	51.0741	50.5004
	54.0962	46.9314
	50.9845	49.135
	48.8442	50.8945
	50.9511	51.0378
	50.8078	49.8004
	65.2921	53.6006
	54.4788	54.2973
	56.1461	49.1195
	62.4123	52.3915
	53.2668	53.7002
	51.7552	49.8196
	48.2813	50.8906
	55.5546	49.2559
	56.7163	53.3177
	47.0044	53.7289
	54.0619	47.5902
	45.1101	49.6903
	52.689	47.3715
	49.6389	49.047
	51.2371	44.248
	47.6165	47.4438
	48.5411	49.5667
	62.4036	52.1251
	57.2074	53.2562
	59.7289	49.3495
	57.1471	50.5866
	51.7764	50.6834
	43.5472	50.8805
	50.358	53.8704
	55.7793	49.7092
	59.9245	51.4464
	54.5093	52.3727
	51.3481	49.0063
	48.0685	49.3992
	47.0596	47.9705
	57.8934	54.8648
	47.0604	50.8668
	55.8194	51.2426
	51.2934	48.6724
	53.3809	51.3972
	62.4344	51.0756
	44.4427	43.2163
	55.0795	49.6852
	49.4147	58.0099
	49.7969	47.784
	59.7864	54.7742
	49.8063	49.0685
	45.0802	44.2357
	49.2968	52.0767
	39.7399	50.6462
	55.9545	53.8513
	51.1158	51.9774
	55.8097	51.8847
	53.1582	48.7841
	55.4916	52.0472
	35.44	50.7629
	47.5872	52.919
	56.3774	51.8267
	42.7314	49.7276
	54.0488	55.6297
	45.5883	50.648
	46.2844	52.024
	56.3366	49.1854
	44.267	46.9742
	53.9923	49.1382
	50.6587	50.5768
	46.8187	52.5277
	48.2934	52.9734
	53.6171	50.1082
	46.8372	45.976
	47.1854	50.0067
	52.2846	44.0203
	50.0438	51.3657
	52.1946	47.8417
	48.1772	49.6834
	50.8179	49.2868
	53.7766	48.1125
	53.2343	50.9852
	49.9759	53.4922
	54.0202	50.9915
	48.9363	51.0936
	51.0168	49.0172
	53.774	56.9305
	51.1556	50.5592
	52.5992	53.4695
	48.8191	51.4855
	47.4902	46.1964
	52.7905	53.4057
	54.7313	52.1696
	51.5215	53.5125
	53.6976	51.7729
	52.2335	51.1866
	46.6112	49.6131
	58.2665	52.9956
	58.1917	53.5207
	55.2284	50.4452
	37.9548	52.1118
	51.6772	53.3027
	51.8377	51.1285
	51.8183	50.9451
	52.6473	52.0778
	52.4894	51.1703
	47.6916	52.8063
	51.7556	51.0705
	52.0681	49.5809
	53.3939	51.6653
	43.5671	52.7188
	41.5678	48.8486
	48.5908	53.2092
	53.6474	50.9891
	49.4748	49.6186
	54.8614	51.0717
	43.671	49.7
	54.7475	49.7368
	39.2638	49.0242
	39.2867	49.3954
	41.0375	47.4646
	43.4564	52.9405
	44.0905	50.9734
	46.7258	49.3561
	51.1122	50.7412
	50.6609	51.7647
	54.7147	52.5544
	53.4813	51.4395
	46.2188	50.7307
	51.7082	46.5242
	52.2232	50.8876
	41.5487	46.853
	40.9086	45.871
	45.2206	50.4878
	41.1621	52.4834
	59.4092	54.347
	49.6381	46.9952
	45.8287	47.6209
	58.4022	51.4497
	53.3779	55.6906
	29.1006	49.4185
	47.4931	50.1843
	52.6975	50.3696
	43.922	48.1107
	54.9647	56.1843
	53.0023	47.2175
	48.0811	47.0883
	48.5827	48.4997
	50.6193	52.3476
	47.4944	52.7825
	47.1862	51.0252
	41.4526	51.6994
	53.4312	53.2958
	46.1429	44.4843
	40.0825	48.707
	51.4201	50.9596
	56.7575	50.6186
	56.989	49.4127
	51.0647	47.8459
	47.0645	52.0435
	54.0703	53.4228
	47.6959	51.9167
	44.982	46.2758
	57.2443	56.0814
	46.623	48.365
	48.684	47.4817
	57.9656	55.1188
	58.287	52.8727
	51.0251	54.4129
	48.2355	47.4599
	46.9076	47.1495
	49.6164	50.541
	47.6562	49.9609
	44.1259	50.6298
	46.8496	50.3679
	61.4442	54.2374
	57.412	53.2458
	46.3033	50.8427
	57.9975	56.0612
	50.3065	48.0339
	57.4661	50.9635
	43.7856	47.2827
	49.1382	54.2171
	37.5468	49.0133
	58.0981	52.7611
	50.5853	47.3238
	55.3453	54.4659
	47.0063	51.3873
	40.7538	49.7902
	48.7809	52.2335
	46.6444	45.4855
	42.9993	51.6364
	51.6081	50.1734
	48.2666	53.6074
	51.2439	50.8254
	58.3225	46.7542
	44.2261	46.1665
	50.554	50.709
	48.8413	49.6379
	54.8199	51.5357
	53.8706	47.0571
	51.3806	54.4606
	56.2487	51.7961
	51.3751	51.5952
	46.9828	49.1588
	44.9344	45.3467
	56.3165	55.1822
	57.39	50.5856
	65.1321	53.5458
	48.368	49.3188
	45.4865	46.858
	48.332	50.9211
	54.263	54.358
	53.8911	52.878
	51.1978	52.2549
	45.0898	49.9987
	43.0149	52.0055
	53.8594	51.6377
	44.7244	50.9382
	41.6867	44.8288
	50.8793	50.4809
	59.6663	51.7674
	61.0772	54.8005
	53.1002	50.2043
	46.0999	47.4954
	46.8282	48.6006
	55.7758	54.3105
	53.0771	53.1666
	57.2945	48.9705
	60.5862	52.8626
	42.3346	50.9429
	54.2321	55.8498
	50.3518	51.531
	43.2425	43.4562
	41.7507	45.615
	47.9963	45.3642
	55.8287	50.7035
	39.5565	49.6014
	51.5622	52.2416
	54.5695	59.0671
	64.8076	55.2869
	42.2354	51.2261
	47.2116	46.5668
	45.8701	48.9939
	53.1614	49.1032
	59.8753	50.7579
	56.1519	47.8619
	53.1178	43.9246
	49.08	55.1256
	50.4157	52.6855
	39.7954	51.9054
	52.2869	54.8378
	46.2317	48.8517
	55.0576	47.8834
	56.6794	49.0144
	42.4741	48.3951
	44.7459	48.7128
	50.3753	54.9717
	51.9252	49.7533
	52.0097	56.8591
	58.9889	50.5642
	55.7015	55.4873
	54.9118	58.6556
	47.0383	52.837
	38.2875	55.3429
	55.9346	52.1689
	49.9341	49.0323
	52.7825	51.0391
	57.2148	53.3115
