# Supplementary material for: Stochastic asymmetric repartition of lytic machinery in dividing CD8+ T cells generates heterogeneous killing behavior
Source: eLife. 2021 Jan 11;10:e62691. doi: 10.7554/eLife.62691 (PMC7867409; doi:10.7554/eLife.62691)
Supplement: Figure 5—source data 1. [file elife-62691-fig5-data1.xlsx]

## Sheet: Figure 5
CD107a distribution between daughter cells in undivided cells , at first division and second division.
Results are from experiments presented in Figure 1 (all divisions)
	Undivided				First division				Second division
	Distribution between daughter cells				Distribution between daughter cells				Distribution between daughter cells
	CD107a	CTV			CD107a	CTV			CD107a	CTV
	32.3552	42.0647			52.3492	49.1535			37.3079	48.3814
	49.5864	46.2145			62.8178	49.6944			50.709	49.3702
	43.4835	52.518			67.6114	51.5142			50.9108	50.8139
	49.0065	52.289			55.454	53.6161			44.7647	53.1347
	50.8801	54.0472			54.2936	47.3935			46.7942	48.8837
	47.3738	53.9532			50.6487	53.0503			50.4753	51.7608
	43.89	50.0426			50.7528	48.6461			49.4153	47.0077
	49.1799	55.6416			39.6439	45.7234			57.1274	45.1574
	53.5021	47.5981			54.8595	45.8021			54.0028	50.8738
	38.457	51.2102			31.5564	48.3132			78.717	57.2542
	50.2592	50.1806			45.9299	49.6135			45.3412	48.0094
	53.8535	52.8907			37.8843	48.3344			57.4142	50.1009
	40.9581	47.6746			42.1074	49.2295			54.4312	51.2129
	57.7989	47.8328			50.4089	47.0135			52.1322	50.9193
	49.1703	51.0946			40.8151	50.2796			42.3159	48.4877
	67.5847	53.9555			40.5456	46.6647			65.2021	49.6741
	53.9031	40.1358			69.7626	57.4174			46.5903	42.0289
	53.6563	48.1164			61.8495	55.3357			36.2434	51.1232
	44.0831	44.1927			48.251	52.5164			45.6138	48.2383
	23.0486	48.7392			62.5121	56.9519			40.5033	38.2783
	53.5929	51.9427			53.2254	52.751			59.9643	48.7569
	48.657	49.5659			47.1615	50.8014			56.2688	46.7604
	51.8993	50.3316			50.9521	54.348			48.2758	50.5727
	59.1048	54.4413			57.3451	51.2787			38.74	43.5029
	42.4327	49.7576			58.8072	54.0188			55.0157	50.0338
	51.9575	56.3692			44.9542	43.9542			42.9682	48.3114
	58.4645	53.7265			46.7428	49.7741			24.4661	47.9566
	73.3113	59.6279			48.9989	49.0121			39.2788	45.8872
	61.7338	55.629			55.0278	50.6556			73.7081	53.5253
	52.2937	34.6101			51.9579	52.8705			48.8486	46.9555
	51.5699	52.82			49.0133	51.2115			63.5975	49.2636
	55.1317	52.9943			38.1048	47.9398			58.4408	51.6236
	52.8577	48.0807			52.8246	50.7794			68.7512	49.2883
	70.5096	47.9918			47.6912	46.685			48.2785	47.2125
	28.9403	48.3812			47.7683	54.1519			49.1116	51.4666
	62.5209	53.3327			56.3313	48.3464			48.7712	43.3454
	49.9086	51.3216			44.9751	51.9229			48.0578	43.3238
	49.8782	46.9368			39.113	53.412			46.8311	49.2152
	40.5992	49.5663			60.7993	56.9891			47.0159	51.3588
	50.2437	45.7248			51.95	51.5222			36.2526	44.0786
	53.3368	50.9973			30.1568	50.7658			46.3333	44.2375
	50.5041	55.7318			53.9594	55.1356			55.9318	51.7796
	34.2785	49.7103			52.4399	49.6119			34.4299	51.5703
	45.4224	50.0304			83.4953	56.4624			43.28	49.8821
	30.9754	27.2083			37.2531	49.0663			48.8093	48.3018
	43.4616	47.9535			58.4485	49.1007			56.9246	52.4827
	53.9748	53.0361			63.4012	51.9342			42.0679	43.4385
	56.0969	52.7711			59.8321	53.8361			43.2677	53.1577
	45.105	46.7582			58.2991	52.6593			53.5418	53.0808
	44.8328	53.4868			60.0444	55.0753			45.8195	51.7231
	44.7212	48.3967			50.6019	46.5428			43.3798	48.6868
	58.5675	55.0971			54.3129	47.0487			55.6404	48.3545
	50.9387	50.9461			47.435	48.7796			42.4769	47.3907
	59.7907	55.7848			45.4335	50.0046			39.477	48.5371
	58.2822	48.6543			50.7186	51.3544			64.919	52.313
	42.3929	44.48			56.9204	54.3552			33.2547	45.4992
	47.2974	55.0216			44.9913	49.4261			66.556	57.1937
	50.6081	51.228			48.4295	45.5217			49.3712	49.0149
	53.677	55.1942			70.5408	58.2325			46.505	47.5313
	52.8189	49.626			55.3561	53.9288			45.5718	47.8834
	37.2344	47.7106			49.1555	45.7552			52.8896	51.6103
	46.9119	49.5541			58.5501	50.3689			49.2035	50.4727
	51.824	50.645			53.2649	54.3489			48.1142	52.9464
					51.7409	52.8558			55.5757	51.4377
	59.1977	51.6849			39.977	48.9688			51.0417	52.0679
	43.0239	50.1475			42.4258	46.2545			63.1603	52.5043
	55.3604	53.3178			67.114	61.2214			54.7328	54.9804
	65.4007	51.0142			46.4345	48.4296			45.4798	46.7544
	41.4988	49.9287			64.4442	51.9147			38.7842	44.1867
	32.4217	49.1297			57.6408	55.1967			56.6512	50.5983
	44.2638	47.0025			42.9653	51.4668			56.7303	53.2242
	47.778	52.2219			48.6671	45.861			47.5117	50.3205
	62.1509	51.959			59.788	52.7533			63.3116	49.848
	49.1794	51.1516			55.1325	53.9312			60.1699	67.0866
	56.4593	50.9257			37.3655	44.3512			54.8152	49.2636
	59.0563	49.4119			59.8852	51.9522			41.1474	49.8902
	41.9902	48.7396			33.901	50.9498			42.0874	48.683
	53.4423	44.7143			53.4408	50.9317			36.2437	46.7115
	63.7097	58.1234			62.1534	52.5976			49.846	49.5133
	37.0479	48.6047			30.2877	48.594			44.2582	49.7672
	39.1503	46.9391			57.4308	51.145			48.2206	49.672
	44.2756	48.0743			44.4196	53.325			68.0922	51.6302
	58.2933	53.4753			48.3803	49.7893			59.4949	51.843
	53.2764	51.3236			46.2151	53.2163			60.3298	52.3231
	30.8237	45.3968			36.1113	47.974			43.8134	51.1813
	56.4252	51.9307			30.4793	51.3451			47.337	53.2955
	51.4843	51.4713			37.9568	49.0512			59.0719	42.3945
	43.728	45.2054			40.0825	46.3825			57.9424	51.0084
	40.3753	48.2442			48.2352	53.6231			51.8679	51.9903
	58.6123	51.5266			35.9494	47.5455			58.2071	53.4607
	61.2766	50.3991			40.1335	49.2576			59.4749	50.8145
	46.0858	44.2771			34.6682	49.6311			50.3593	51.3947
	50.4288	49.8293			58.5839	50.7977			49.8002	48.1358
	35.2605	48.8752			45.2628	48.4868			45.8814	46.7489
	45.997	49.6347			48.735	52.533			41.9602	47.9519
	59.6075	49.005			61.6161	48.9374			45.201	50.6306
	44.5423	47.4871			60.3736	49.2868			41.8952	47.153
	66.073	51.0981			50.9549	52.0363			61.4756	47.4421
	51.6594	50.9506			37.2418	48.1929			44.6079	53.2558
	77.5562	50.9333			47.783	47.1527			50.2844	51.3693
	46.7338	49.8911			59.2082	49.7111			57.7615	51.0775
	42.072	50.0831			67.5378	50.5908			53.7542	52.786
					33.4727	47.9346			63.2749	52.3685
	51.8274	47.2622			44.6088	50.5465			49.3122	50.56
	38.6762	46.8905			48.4531	43.2103			46.9587	48.7702
	26.4294	47.2735			20.2588	48.9279			61.0793	51.0429
	68.3084	51.637			61.7588	49.2133			53.1835	53.2758
	46.5335	52.9017			41.1272	47.3441			50.6295	52.3764
	44.108	47.2655			54.8503	50.5777			43.4531	49.162
	49.4745	45.1998			43.6134	46.5603			35.6409	48.7941
	55.422	53.6881			57.2581	51.6508			52.0557	47.0257
	41.8051	40.9705			51.8886	48.7822			66.9808	51.2467
	51.4503	48.0391			61.5496	46.307			49.6139	49.4676
	50.3719	45.6705			56.1095	52.911			47.325	46.5512
	33.4281	41.6812			49.9418	47.8123			61.6612	52.6119
	59.155	48.6928			53.8034	50.0364			47.2754	43.3551
	44.3037	49.7478			58.9502	47.0654			54.5006	44.4732
	36.4047	51.0865			55.0099	48.8532			38.8505	46.743
	62.7206	48.3697			36.3474	47.3432			48.3913	48.1037
	35.651	41.7263			51.1144	50.2735			47.2772	51.7363
	58.3805	53.7056			46.9127	49.0961			54.2491	58.2337
	47.073	43.9965			53.8749	49.5981			53.6515	53.4856
	59.6183	54.7932			49.3975	48.0451			42.6427	44.0524
	51.1351	47.0672			55.5811	49.9439			33.5247	48.9233
	71.6906	47.1995			62.3329	47.7124			45.5686	44.1831
	61.2644	50.3361			56.8431	56.7638			48.9427	50.3546
	47.9755	47.6161			60.5113	54.1065			53.2538	49.6236
	64.8694	54.4467			50.6748	49.0594			43.7821	47.4922
	34.723	50.7849			46.9185	51.4928			56.987	51.3329
	59.1253	55.4836			44.7354	48.9208			44.0848	43.4584
	53.0476	45.529							54.2572	48.9737
	42.2116	46.1737			35.541	41.5613			46.0664	47.9472
	54.586	52.0703			58.0779	55.6168			50.187	52.1352
	53.1526	49.7069			62.6548	54.2528			58.1657	50.1151
	52.5809	50.3644			51.5138	55.2832			37.5229	50.3487
	34.8257	41.262			26.7037	48.3645			53.6224	54.6964
	44.2173	49.1797			55.2713	48.8242			56.816	51.8925
	55.5908	52.6342			37.0014	50.1059			44.2276	46.3165
	45.9419	50.3139			37.8437	47.9034			52.9096	51.1317
	40.1806	30.425			47.6304	49.3671			53.486	43.9641
	49.101	49.5097			43.3087	55.0952			68.0638	62.7994
	48.994	51.0286			67.9448	55.812			40.4842	45.1108
	68.7511	52.4346			54.0875	66.2537			37.4793	49.2023
	53.198	53.9897			51.9265	29.4309			47.6431	52.5782
	23.9339	39.8996			51.942	49.2972			36.2628	48.1611
	50.7723	46.9364			43.7999	52.8267			53.8228	59.5015
	52.2784	48.9953			45.2612	43.6566			65.1182	55.8318
	51.0624	48.804			66.1961	51.5113			52.1819	49.3425
	35.3546	48.4528			47.7335	49.4318			42.7122	50.3025
	44.6435	50.3535			43.9455	44.6198			54.4562	48.3882
	44.7711	48.8034			61.9093	53.8614			52.1007	50.4678
	39.079	49.4982			54.0644	50.3471			53.4824	49.9776
	45.0435	52.4608			55.7988	52.1706			57.3916	46.2688
	48.4643	51.2848			58.1461	48.7428			42.4226	47.3304
	42.7186	43.9742			51.933	49.2016			45.498	44.8577
	52.6895	50.3594			43.8364	46.2619			68.2059	53.0836
	49.3216	51.1865			51.82	49.0135			50.4446	50.7534
	50.9233	54.0352			33.7742	45.6816			52.9936	45.9445
	48.7218	50.0883			36.9063	45.61			53.5845	49.6329
	53.4456	52.348			48.7347	50.8417			56.3359	50.4946
	26.0222	41.7026			33.2823	50.605			55.4392	47.4549
	40.0302	44.2209			41.8845	48.7339			58.8107	50.7998
	55.4238	51.9389			36.6625	44.6044			46.4991	50.5793
	47.2029	51.0931			63.8895	58.8852			45.4897	50.6295
	59.3405	51.652			55.6689	51.9773			52.3603	54.727
	52.0305	50.2571			38.001	49.017			42.1031	41.7612
	44.0401	49.5466			35.1677	52.7152			51.0163	52.9348
	57.868	47.9777			51.5121	47.2577			39.7871	46.2169
	52.5209	56.1643			41.6672	48.5744			39.6453	48.9237
	53.11	47.3777			48.1208	45.6955			42.9336	49.5382
	53.0037	48.6816			42.812	43.5126			49.7182	47.2153
	65.5894	57.6204			49.2085	55.2773			57.6404	51.9849
	41.7227	45.8251			61.6796	52.579			47.7736	52.6341
	54.9294	53.7766			52.8065	53.2867			50.8568	52.0636
	49.0413	49.6178			50.3863	50.4847			47.3297	46.7428
	46.796	52.7095			52.1677	50.2998			59.9448	54.6615
	64.7069	49.895			53.2348	49.5957			44.8496	49.0384
	63.9657	48.551			55.8586	49.1865			57.4252	52.2319
	56.8016	49.0867			54.7236	53.0866			59.7645	55.6941
	41.986	45.96			53.4768	49.4208			56.0519	52.7278
	60.5851	50.9321			53.8535	42.6572			59.4835	54.0065
	45.9048	48.5408			55.2993	52.0114			54.002	52.3701
	37.8184	52.917			45.4643	52.9906			56.8694	45.5237
	45.7942	46.9758			50.3784	48.1965			63.0324	55.0409
	44.3565	50.0169			52.0114	54.7286			45.4425	46.7008
	40.1335	47.4402			48.3732	49.456			41.6518	44.5917
	38.1199	49.3173			62.1986	54.8331			60.7608	51.6351
	48.7045	48.2424			56.8734	50.3337			47.3768	50.2879
	48.5535	49.5973			64.6329	48.929			50.1526	50.8145
	47.6427	49.6455			43.7557	49.0551			53.5701	53.2013
	44.3216	46.7017			45.5398	45.2793			37.0541	51.7603
	34.31	52.9523			57.7156	50.9485			52.9634	54.2697
	47.8233	50.6729			49.8504	47.008			54.6624	52.0829
	55.1089	51.9819			58.273	55.8311			54.5524	45.1205
	46.8337	50.2698			50.1941	51.9189			59.3661	52.9745
	69.5692	51.0796			50.2537	49.7993			55.4999	53.6935
	45.7001	46.1298			48.2126	45.4021			52.4822	57.0418
	45.2895	45.3765			69.425	53.7953			63.3538	53.4577
	46.232	53.6051			49.4172	48.8081			52.1008	53.1969
	65.3389	50.5293			38.5203	54.0779			53.2376	52.4016
	46.849	47.1385			41.3941	47.8997			36.3285	47.6499
	49.3286	48.7932			44.387	48.3074			47.2276	49.9034
	44.3644	48.9728			59.8097	52.2322			46.2716	53.6375
	39.9845	47.4218			58.2885	47.8247			48.1765	51.6387
	47.8512	51.767			38.7642	49.3615			50.5128	48.5179
	51.0837	52.0384			40.6698	45.2406			49.5273	42.8739
	47.4307	50.1568			54.0303	52.4005			61.4372	48.5801
	36.2901	50.1163			66.366	48.1341			46.8862	48.8032
	51.2682	29.1961			52.0366	48.9155			41.2311	46.0892
	71.9574	50.4363			53.1024	55.0632			58.1345	52.4905
	41.2667	46.4487			44.0423	48.756			57.7262	55.4538
	50.2411	53.9354			48.3809	45.1712			65.1041	55.6453
	44.5245	51.3737			50.3744	50.8914			42.54	55.1472
	46.6116	46.4031			61.0256	51.8479			51.6447	52.7051
	58.25	55.1332			42.6704	49.2286			33.2497	51.3865
	52.5761	53.4082			48.7442	48.4985			45.5184	51.7375
	39.6587	50.9053			65.7082	56.4775			51.8021	50.4157
	47.361	46.0162			50.7338	50.2426			54.2846	46.4881
	56.9791	49.13			51.8143	47.9269			51.8689	51.176
	48.057	47.7101			40.922	49.7791			48.2105	45.8915
	71.2903	52.0855			62.2792	51.7341			51.068	57.1306
	56.0863	44.6034			45.1592	50.1713			45.712	54.196
	61.762	49.4218			42.9233	51.2207			49.5517	44.533
	52.5256	48.1378			58.049	51.3551			56.2373	56.1175
	40.2503	48.1096			46.3999	48.4592			47.7156	49.7648
	60.5894	48.3606			46.3779	45.5742			43.4032	51.8746
					67.583	49.359			47.4049	49.289
	38.5521	46.8613			54.3745	52.1451			53.5404	49.2643
	49.7105	48.3194			40.2566	48.3226			52.4302	56.3139
	54.6716	53.5911			45.5924	46.5759			60.5099	56.9339
	43.1938	47.3113			48.9939	47.7062			50.2536	53.0938
	58.258	54.9107			50.3794	50.6958			40.1559	49.7719
	45.3749	42.9667			46.147	50.4662			51.0242	51.5847
	47.2415	49.4463			54.9216	50.3177			42.5243	50.6977
	39.5036	50.4117			54.2212	57.4575			45.6794	51.1668
	49.0284	50.0884			43.9726	53.9423			37.1953	40.7753
	36.1668	42.4032			56.1485	53.4106			38.9553	46.5969
	51.4689	52.3509			48.4458	45.9843			48.1342	48.7323
	49.8191	44.6203			38.9353	47.9782			52.7442	43.937
	34.9896	51.562			43.2754	51.1031			48.4337	46.7666
	72.589	49.5023			50.973	48.6977			57.2103	52.5359
	40.5989	51.5535			42.9607	42.6385			44.5264	49.1424
	47.7776	51.892			46.4472	48.0759			55.5675	52.3909
	55.4078	53.5059			58.2378	51.1429			55.3027	52.8245
	49.4055	46.9761			51.5085	51.5309			64.7858	55.7422
	50.5566	48.7033			54.803	52.8447			47.3383	48.7154
	60.2213	58.8937			56.9446	53.0222			54.6863	49.9849
	47.7687	47.5245			44.0771	51.1933			52.5936	50.8182
	55.2752	53.0388			44.4013	49.6278			38.7041	48.9084
	46.9517	52.3421			54.8376	56.1913			54.5498	55.7415
	51.4595	48.4335			63.5526	56.698			70.225	53.1219
	75.4825	55.309			39.5658	47.5056			64.476	48.9395
	46.9844	50.4777			52.4964	51.9474			47.041	46.6579
	30.6366	46.922			56.1447	50.6478			51.6018	51.4448
	53.2946	50.3719			46.0523	44.4881
	69.4582	50.0995			48.3159	48.6442
	40.405	45.8994			48.881	51.7996
	58.513	51.4072			41.9724	44.0683
	48.6708	47.5914			54.2266	55.2636
	49.2622	50.5189			50.1489	50.5759
	34.761	44.6634			51.6387	49.3828
	41.3623	48.9135			49.8528	52.2051
	45.4455	47.3962			58.6848	51.1794
	57.8612	50.2366			57.7809	55.2966
	61.9371	50.9929			40.16	52.9175
	50.4731	50.5585			49.0913	53.4566
	39.7293	49.5412			49.2973	49.563
	44.3107	45.2595			57.8463	56.3051
	46.3064	46.374			33.8378	43.7605
	46.9871	42.7685			41.3342	44.0459
	44.3601	50.813			40.9384	49.173
	54.3905	49.7064			52.3525	51.6633
	46.8632	45.0883			45.7626	47.895
	51.6199	52.1209			58.338	58.9599
	65.8512	53.6005			55.5941	52.2018
	54.3176	50.9349			46.9751	40.7885
	46.8748	43.7178			43.9791	47.3598
	29.5965	48.0974			48.9782	46.2182
	46.3781	47.8236			53.3602	52.0637
	60.5464	55.5449			50.6509	43.2735
	36.8077	39.9434			50.1949	50.0472
	64.1381	51.9672			66.3653	50.0277
	40.1969	50.0003			35.8503	48.6607
	53.9731	53.6118			56.0326	55.1645
	45.0528	50.8695			43.7838	47.8045
	46.5812	49.8794			48.1975	53.6692
	50.8172	46.2			44.2122	50.945
	36.3613	47.8838			44.4746	51.7544
	63.5596	51.6385			48.3212	48.8818
	48.8235	47.0196			40.4358	48.4962
	42.552	49.8406			44.7918	42.9538
	45.2443	48.3436			47.2723	45.2008
	67.4394	52.2199			53.1391	51.0493
	52.0015	45.4006			48.7383	47.5204
	47.0325	48.982			58.0413	51.2437
	49.1095	51.3412			39.108	45.1235
	44.2365	50.9757			46.9104	51.8066
	51.079	53.1876			61.0773	50.7416
	49.7118	45.5305			39.3616	49.9723
	62.1335	48.4013			54.7797	53.3122
	49.6286	52.7637			44.562	52.7035
	39.2229	47.2415			56.9457	53.7917
	49.257	51.0876			50.1986	49.6472
	54.9962	47.7498			51.7934	51.2595
	40.7934	51.3507			53.8501	50.6662
	35.8347	47.4411			54.8575	54.8787
	51.0332	51.1033			59.3728	46.8475
	50.1529	51.2547			46.9075	51.7506
	54.888	50.2499			41.5336	40.8544
	39.8837	50.0077			49.1454	52.2991
	46.5647	53.3113			56.5637	49.407
	58.0907	56.3195			56.3419	51.013
	56.2163	53.2733			51.2439	42.2731
	54.2536	54.1761			49.6067	45.6066
	34.6959	42.7157			47.8061	52.0652
	29.673	16.8639			60.6497	50.5855
	42.5926	49.2663			54.1208	54.1232
	45.8469	50.2596			57.1058	55.6658
	59.9	51.0624			57.7317	53.9488
	46.6748	47.2491			50.9192	49.6264
	48.4856	48.3484			49.2429	47.9464
	64.6803	49.197			54.4164	49.4383
	67.1749	46.5892			41.6087	49.3826
	40.9854	50.2508			51.2132	49.4821
	44.2963	48.0207			46.8587	44.8432
	43.6912	45.3639			45.6162	52.4009
	51.769	51.5057			41.4855	50.487
	46.8986	48.4512			54.6841	50.6889
	56.5769	54.4357			43.066	50.085
	44.4468	49.5906			45.2816	48.9396
	51.5096	56.1345			50.0924	60.1528
	52.3865	50.2629			46.1768	49.6073
	50.5587	56.4426			54.4659	49.5386
	57.3114	54.6436			40.2202	48.5034
	51.7783	46.7144			42.145	48.0651
	40.2517	46.9744			39.6368	46.4349
	40.1609	34.6418			57.8576	52.3336
	44.6242	47.5698			49.9928	50.4094
	49.7202	49.8321			61.4733	54.7272
	52.9886	55.8298			55.941	52.5823
	55.2741	52.383			53.3648	49.0545
	61.7452	57.1006			44.2376	44.2551
	51.8153	48.6276			52.0136	49.4579
	48.2285	52.8137			50.3173	48.2931
	52.7284	49.4169			48.5707	42.3318
	64.4352	50.7252			57.3158	53.7883
	46.56	48.487			60.7438	47.4599
	51.8478	50.3098			45.3475	50.2488
	58.4627	53.1638			48.8181	50.9791
	54.9197	58.4592			49.4204	48.3941
	25.5218	39.5183			47.6992	50.1379
	46.1429	53.3958			58.5598	50.063
	41.387	52.1346			52.0006	52.3135
	50.6298	50.4369
	54.6155	53.6854
	47.274	48.511
	56.3985	51.0254
	56.189	58.0121
	53.1007	51.2279
	48.7347	50.8955
	56.7671	46.722
	41.3256	51.1313
	57.5296	53.8378
	53.2302	52.9982
	49.6827	52.3519
	53.2422	50.6203
	48.929	33.6602
	42.3103	45.3412
	50.4332	47.3831
	55.1075	49.1682
	57.9661	48.5392
	51.9663	53.1118
