# Supplementary material for: Stochastic asymmetric repartition of lytic machinery in dividing CD8+ T cells generates heterogeneous killing behavior
Source: eLife. 2021 Jan 11;10:e62691. doi: 10.7554/eLife.62691 (PMC7867409; doi:10.7554/eLife.62691)
Supplement: Figure 7—source data 1. [file elife-62691-fig7-data1.xlsx]

## Sheet: Figure 7B
Cytotoxicity assay - (Data presented in Figure 7B)
Experiment #1	Lysotracker High						Lysotracker Low
	3 biological replicates			mean of replicates	Substraction (pulse minus unpulse)		3 biological replicates			mean of replicates	Substraction (pulse minus unpulse)
unp ratio E/T 1:1	13.4	11.9	10.4	11.9			13.9	14.2	13.1	13.7333
pulse ratio E/T 1:1	61.7	62.4	60.4	61.5	49.6		49.7	48.8	43.7	47.4	33.6667
unp ratio E/T 1:2	10.2	13.6	10.1	11.3			10	10.1	10.1	10.0667
pulse ratio E/T 1:2	49	49.7	47	48.5667	37.2667		30.5	30.3	30.7	30.5	20.4333
unp ratio E/T 1:10	7.56	6.77	6.47	6.93333	10.2333		7.35	8.33	9.08	8.25333
pulse ratio E/T 1:10	17.7	17.5	16.3	17.1667			*	14.4	13.9	14.15	5.89667
Experiment #2	Lysotracker High						Lysotracker Low
	3 biological replicates			mean of replicates	Substraction (pulse minus unpulse)		3 biological replicates			mean of replicates	Substraction (pulse minus unpulse)
unp ratio E/T 1:1	11	9.03	9.88	9.97			9.91	8.52	8.64	9.02333
pulse ratio E/T 1:1	64.8	65.9	68.4	66.3667	56.3967		40.8	43.6	44.1	42.8333	33.81
unp ratio E/T 1:2	9.53	8.88	10.5	9.63667			9.45	8.74	8.51	8.9
pulse ratio E/T 1:2	42.5	43.9	45.5	43.9667	34.33		21.1	26.4	29.3	25.6	16.7
unp ratio E/T 1:10	9.23	12.8	11.6	11.21			9.38	10.1	11.1	10.1933
pulse ratio E/T 1:10	17.6	19.2	16.9	17.9	6.69		14.4	13.1	12.9	13.4667	3.27333
Experiment #3	Lysotracker High						Lysotracker Low
	3 biological replicates			mean of replicates	Substraction (pulse minus unpulse)		3 biological replicates			mean of replicates	Substraction (pulse minus unpulse)
unp ratio E/T 1:1	11.7	10.1	8.76	10.1867			11.2	10.5	10.4	10.7
pulse ratio E/T 1:1	38.7	46.5	49.4	44.8667	34.68		22.9	23.3	24.7	23.6333	12.9333
unp ratio E/T 1:2	10.4	10.6	12.1	11.0333			10.6	10.5	11.3	10.8
pulse ratio E/T 1:2	29.8	29.8	32.9	30.8333	19.8		15.8	16.6	17.5	16.6333	5.83333
unp ratio E/T 1:10	9.97	12.8	12.5	11.7567			12.8	11.9	13.2	12.6333
pulse ratio E/T 1:10	16.9	15.4	13.5	15.2667	3.51		11.2	11.7	11.4	11.4333	-1.2
biological replicate = T cells and JY cells (each from unique sources) has been putted in 3 different culture wells for killing assay. Each well has been analysed independently via FACS analysis
* this replicate has been lost due to Flow Cytometer technical problem
