# Supplementary material for: Stochastic asymmetric repartition of lytic machinery in dividing CD8+ T cells generates heterogeneous killing behavior
Source: eLife. 2021 Jan 11;10:e62691. doi: 10.7554/eLife.62691 (PMC7867409; doi:10.7554/eLife.62691)
Supplement: Figure 7—source data 2. [file elife-62691-fig7-data2.xlsx]

## Sheet: Figure 7D 
CD107a Mean Fluorescence Intensity (MFI) at the surface of CD8+ (data presented in Figure 7D)
Experiment #1	Lysotracker High					Lysotracker Low
	2-3 biological replicates			mean of replicates		2-3 biological replicates			mean of replicates
unp ratio E/T 1:2	634	596		615		716	656		686
pulse ratio E/T 1:2	12985	11894	13177	12685.3		3429	3786	3337	3517.33
Experiment #2	Lysotracker High					Lysotracker Low
	2-3 biological replicates			mean of replicates		2-3 biological replicates			mean of replicates
unp ratio E/T 1:2	757	775		766		708	607		657.5
pulse ratio E/T 1:2	11598	12239	11509	11782		3160	3216	3043	3139.67
Experiment #3	Lysotracker High					Lysotracker Low
	2-3 biological replicates			mean of replicates		2-3 biological replicates			mean of replicates
unp ratio E/T 1:2	1396	1176		1286		1062	1300		1181
pulse ratio E/T 1:2	10366	9943	8700	9669.67		2799	3272	2704	2925
Experiment #4	Lysotracker High					Lysotracker Low
	2-3 biological replicates			mean of replicates		2-3 biological replicates			mean of replicates
unp ratio E/T 1:2	1180	1251		1215.5		1085	1073	979	1045.67
pulse ratio E/T 1:2	10291	11292	11667	11083.3		3488	3621	3564	3557.67
