# Supplementary material for: Stochastic asymmetric repartition of lytic machinery in dividing CD8+ T cells generates heterogeneous killing behavior
Source: eLife. 2021 Jan 11;10:e62691. doi: 10.7554/eLife.62691 (PMC7867409; doi:10.7554/eLife.62691)
Supplement: Figure 7—source data 3. [file elife-62691-fig7-data3.xlsx]

## Sheet: Figure 7E 
CD8 Mean Fluorescence Intensity (MFI) (data presented in Figure 7E)
Experiment #1	Lysotracker High						Lysotracker Low
	2-3 biological replicates			mean of replicates	Normalization		2-3 biological replicates			mean of replicates	Normalization
pulse ratio E/T 1:2	3411	3496	3717	3541.33	26.2983		2898	2999	2800	2899	31.564
E alone	13938	12994		13466	100		9373	8996		9184.5	100
Experiment #2	Lysotracker High						Lysotracker Low
	2-3 biological replicates			mean of replicates			2-3 biological replicates			mean of replicates
pulse ratio E/T 1:2	3306	3708	3535	3516.33	26.256		2787	3290	3056	3044.33	31.7184
E alone	13512	13273		13392.5	100		9349	9847		9598	100
Experiment #3	Lysotracker High						Lysotracker Low
	2-3 biological replicates			mean of replicates			2-3 biological replicates			mean of replicates
pulse ratio E/T 1:2	3322	3471	2967	3253.33	21.4049		2825	3013	2642	2826.67	26.1136
E alone	15039	15359		15199	100		10916	10733		10824.5	100
Experiment #4	Lysotracker High						Lysotracker Low
	2-3 biological replicates			mean of replicates			2-3 biological replicates			mean of replicates
pulse ratio E/T 1:2	2923	1887	1972	2260.67	24.7817		2028	1794	1593	1805	24.8429
E alone	9111	8879	9377	9122.33	100		6960	7864	6973	7265.67	100
