# Supplementary figures and images for: Stochastic asymmetric repartition of lytic machinery in dividing CD8+ T cells generates heterogeneous killing behavior
Source: eLife journal article supplement (doi:10.7554/elife.62691), 2021-01-11

Figure 1- figure supplement 1

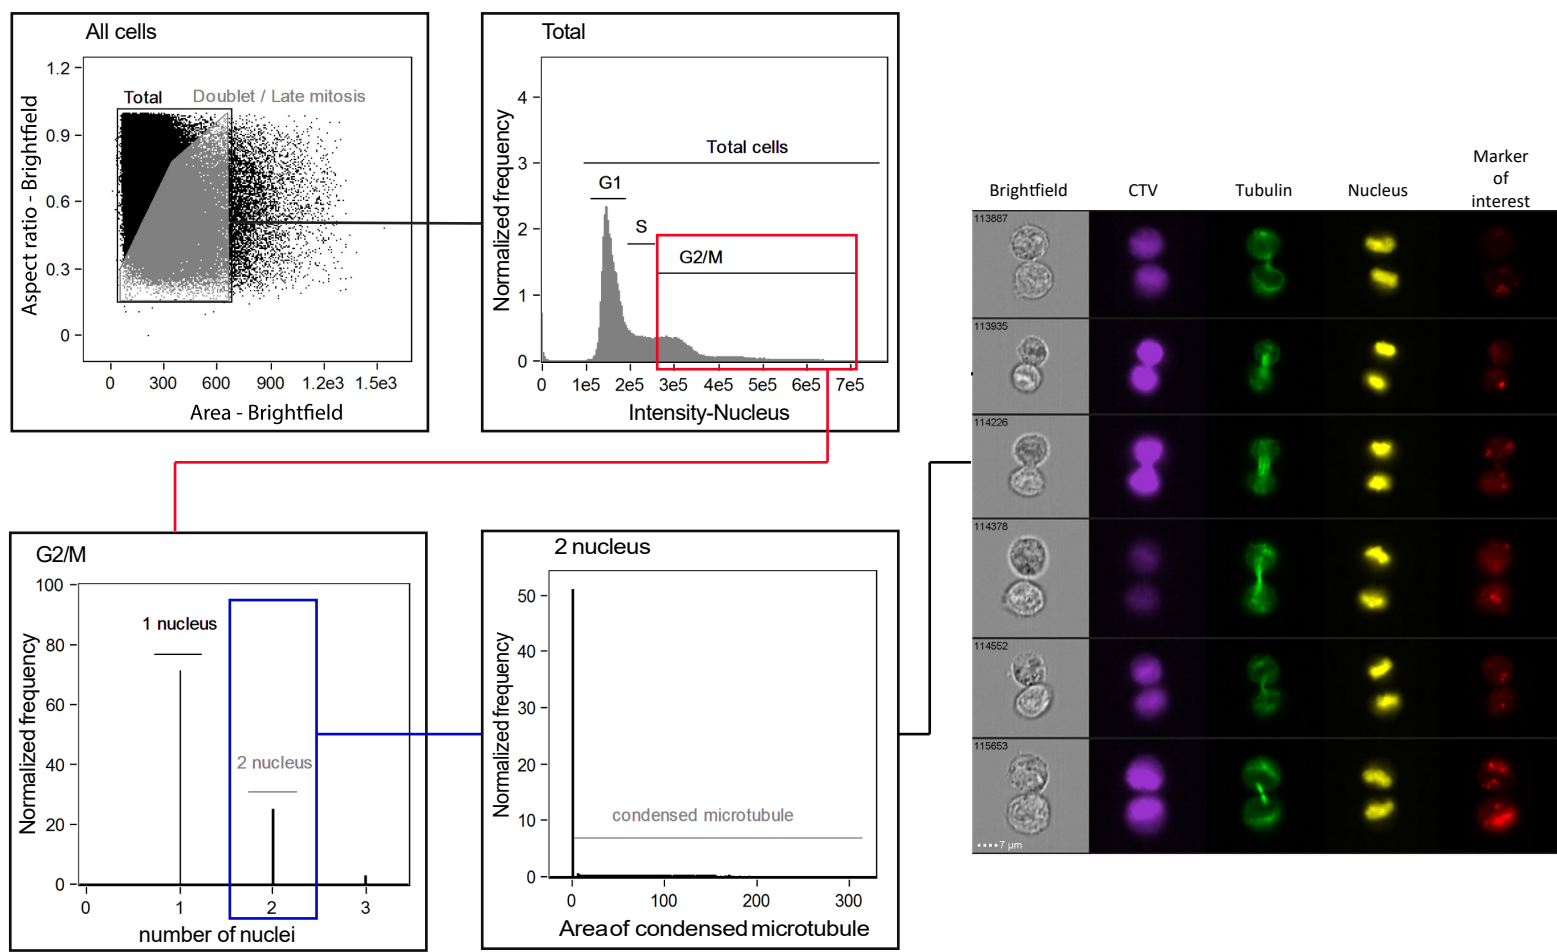

Supplement: supp [file elife_poa_e62691_Figure_1_figure_supplement_1.pdf › elife_poa_e62691_Figure_1_figure_supplement_1.pdf]

Figure 1- figure supplement 2

A

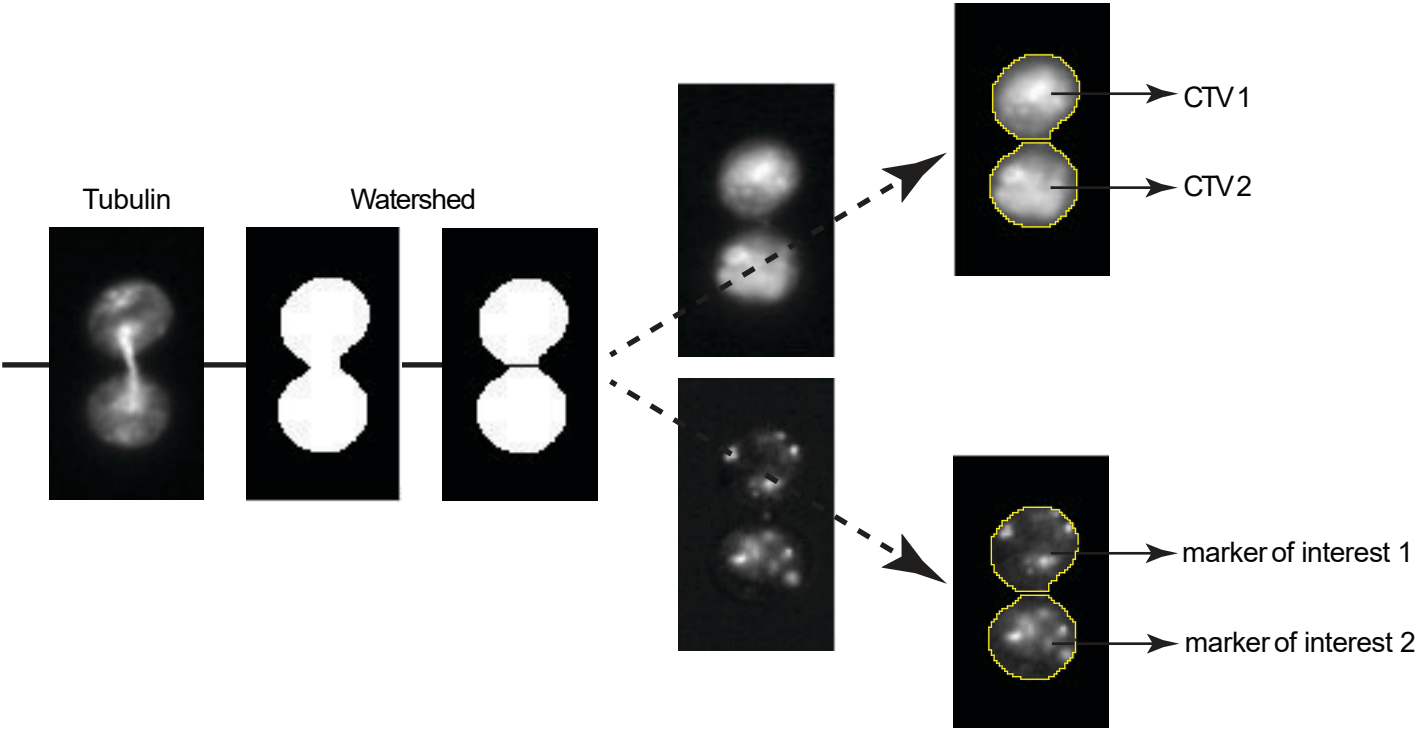

B

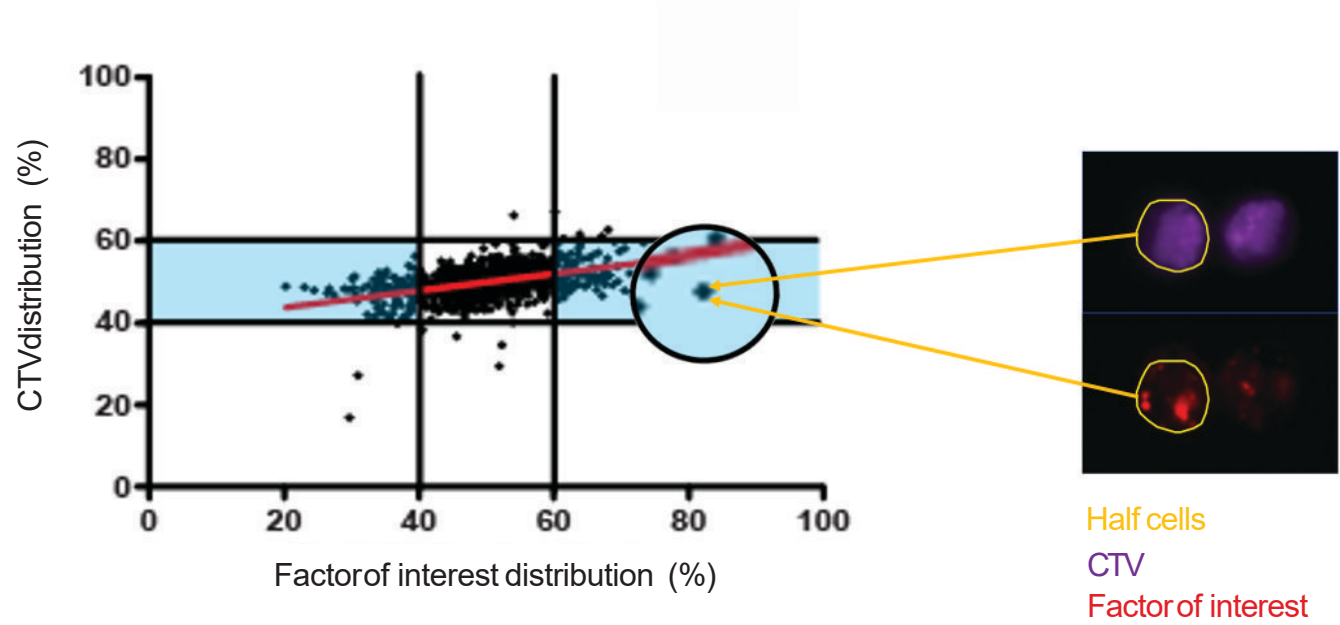

Supplement: supp [file elife_poa_e62691_Figure_1_figure_supplement_2.pdf › elife_poa_e62691_Figure_1_figure_supplement_2.pdf]

Figure 1- figure supplement 3

A

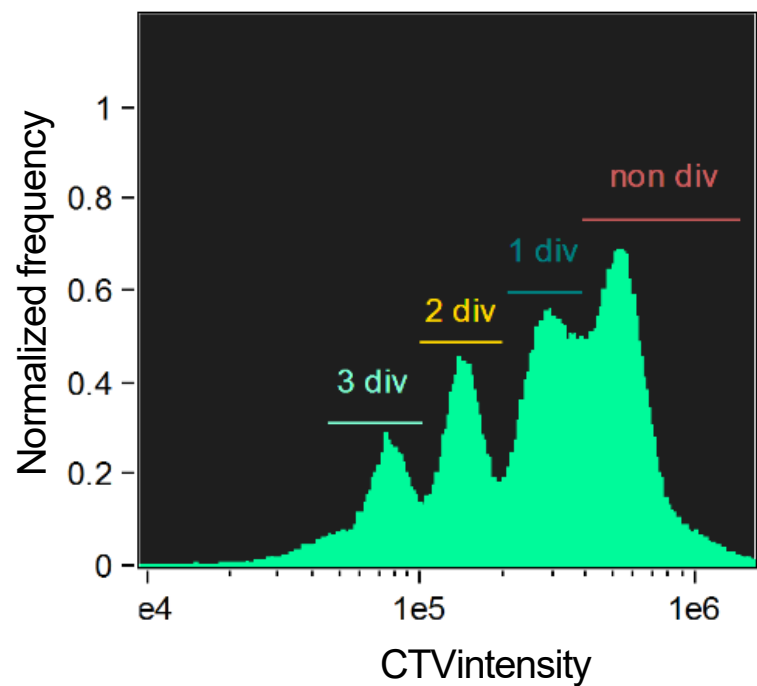

B

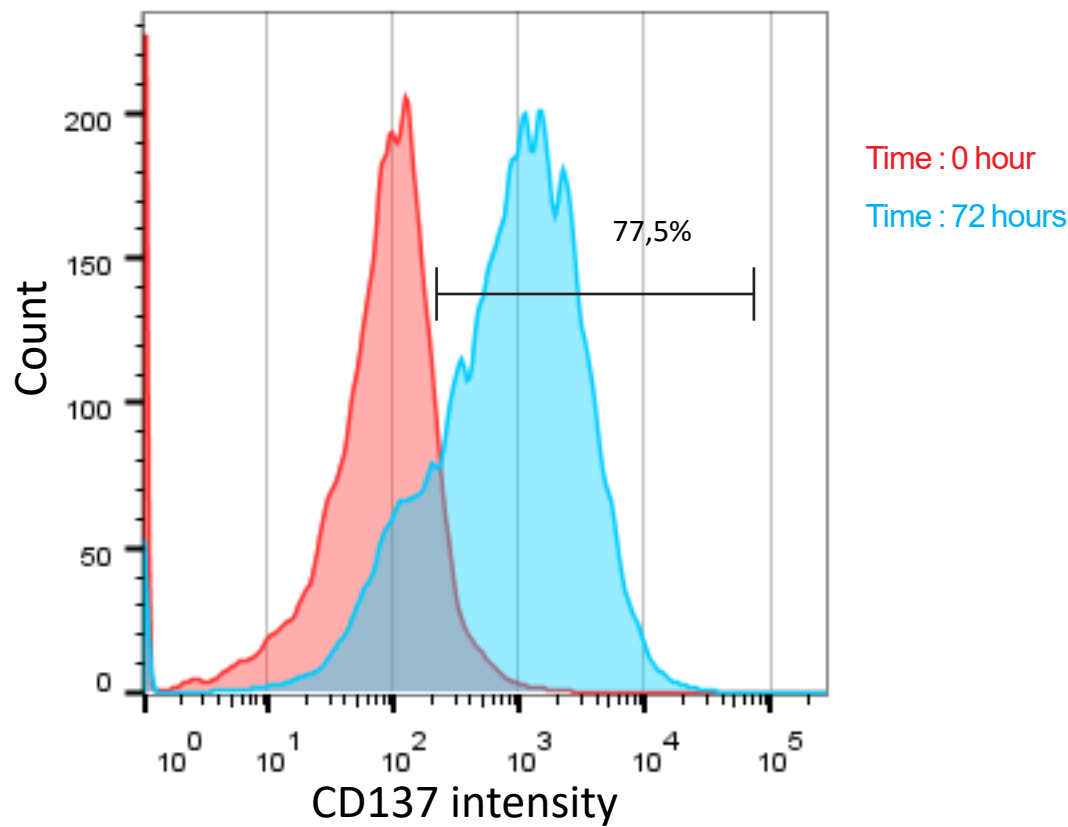

Supplement: supp [file elife_poa_e62691_Figure_1_figure_supplement_3.pdf › elife_poa_e62691_Figure_1_figure_supplement_3.pdf]

Figure 1- figure supplement 4

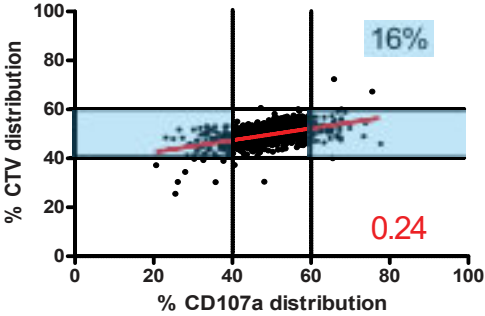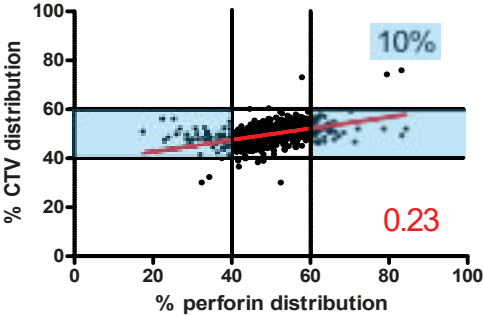

Supplement: supp [file elife_poa_e62691_Figure_1_figure_supplement_4.pdf › elife_poa_e62691_Figure_1_figure_supplement_4.pdf]

Figure 6- figure supplement 1

A

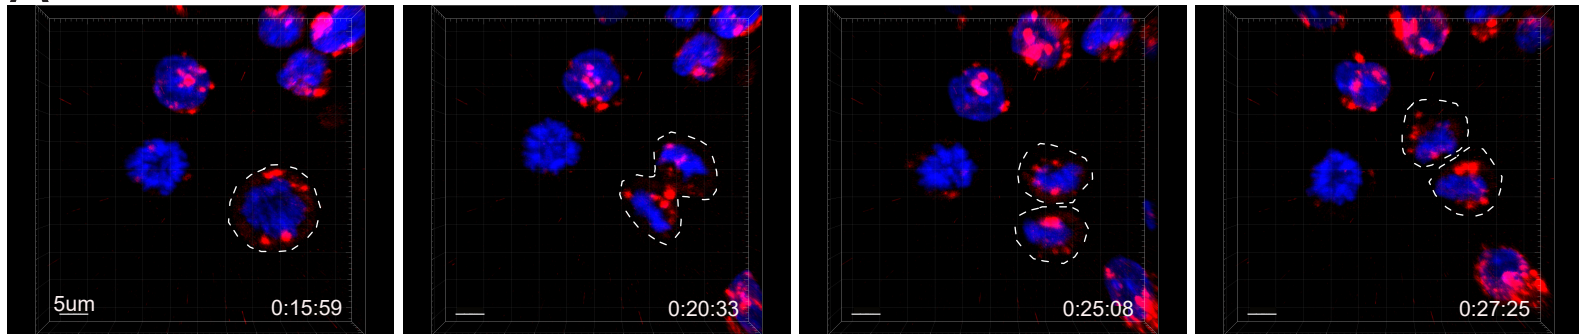

B

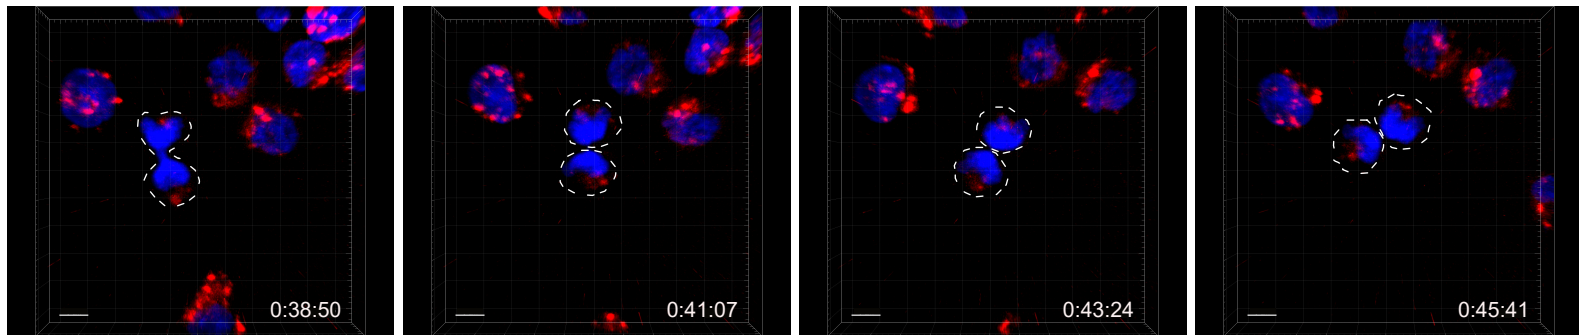

Supplement: supp [file elife_poa_e62691_Figure_6_figure_supplement_1.pdf › elife_poa_e62691_Figure_6_figure_supplement_1.pdf]
